# 1 The *C. elegans* gonadal sheath Sh1 cells associate selectively with a differentiating 2 germ cell population in the proliferative zone

3  
4 Xin Li<sup>1</sup>, Noor Singh<sup>1</sup>, Camille Miller<sup>1</sup>, India Washington<sup>1</sup>, Bintou Sosseh<sup>1</sup>, Kacy Lynn Gordon<sup>1,\*</sup>

5  
6 <sup>1</sup>Department of Biology, The University of North Carolina at Chapel Hill, Chapel Hill, NC, 27599, USA

7 \*Correspondence: [kacy.gordon@unc.edu](mailto:kacy.gordon@unc.edu)

8 Department of Biology, CB #3280, University of North Carolina at Chapel Hill, Chapel Hill, NC, 27599,  
9 USA

## 10 11 **Abstract**

12 The *C. elegans* adult hermaphrodite germ line is surrounded by a thin tube formed by somatic sheath  
13 cells that support germ cells as they mature from the stem-like mitotic state through meiosis,  
14 gametogenesis and ovulation. Recently, we discovered that the distal-most Sh1 sheath cells  
15 associate with mitotic germ cells as they exit the niche. Here we report that these distal sheath-  
16 associated germ cells differentiate first in animals with temperature-sensitive mutations affecting germ  
17 cell state, and stem-like germ cells are maintained distal to the Sh1 boundary. We analyze several  
18 markers of the distal sheath, which is best visualized with endogenously tagged membrane proteins,  
19 as overexpressed fluorescent proteins fail to localize to distal membrane processes and can cause  
20 gonad morphology defects. However, such reagents with highly variable expression can be used to  
21 determine the relative positions of the two Sh1 cells, one of which often extends further distal than the  
22 other.

## 23 24 **Introduction**

25 The *C. elegans* hermaphrodite gonad is a fruitful system in which to study organogenesis, meiosis,  
26 and stem cell niche biology. Recent work from our group (Gordon et al., 2020), used two  
27 endogenously tagged alleles of genetically redundant innexin genes *inx-8* and *inx-9* to visualize the  
28 somatic gonadal sheath of the *C. elegans* hermaphrodite. We discovered that the distal most pair of  
29 sheath cells, called Sh1, lies immediately adjacent to the distal tip cell (DTC), which is the stem cell  
30 niche of the germ line stem cells. Previously (based on electron microscopy and on cytoplasmic GFP  
31 overexpression from transgenes active in the sheath (*lim-7p::GFP*) (Hall et al., 1999) or its progenitor  
32 cells (*lag-2p::GFP*) (Killian and Hubbard, 2005)), Sh1 cells were thought to associate only with germ  
33 cells well into the meiotic cell cycle, so our finding required a reimagining of the anatomy of the distal  
34 gonad.

35  
36 Here, we confirm that the Sh1 cells fall at the boundary of a population of germ cells in a stem-like  
37 state, report other markers that label the Sh1 cells, and verify that these markers can be used to  
38 assess gonad anatomy without unduly impacting the gonad itself. We also discuss reagents that are  
39 not suitable markers of Sh1 cells, including an overexpressed, functional cell death receptor that is  
40 used to mark Sh1 in a recent study (Tolkin et al., 2021). Finally, we consider best practices for using  
41 endogenously tagged proteins for cell and developmental studies.

## 42 43 **Results**

### 44 *Distal Sh1 associates with the population of germ cells that differentiate first when progression* 45 *through mitosis is halted or Notch signaling is lost*

46 The DTC expresses the Notch ligand LAG-2, which is necessary to maintain the germ line stem cell  
47 pool (Henderson et al., 1994). Recent work has shown that the active transcription of Notch targets  
48 *sygl-1* and *lst-1* (Lee et al., 2019) and the accumulation of their proteins (Shin et al., 2017) is  
49 restricted to the distal-most germ cells, describing a population of stem-like germ cells ~6-8 germ cell  
50 diameters (~30-40  $\mu\text{m}$ ) from the distal end of the gonad. A similar spatial arrangement was found in  
51 earlier work that used an *emb-30* temperature-sensitive allele to arrest germ cell division, thus halting  
52 the distal-to-proximal movement of germ cells and allowing cells to differentiate outside of the niche  
53 and remain undifferentiated in the niche (Cinquin et al., 2010). Similar results were obtained using  
54 *glp-1* temperature sensitive alleles to stop Notch signal transduction and observe where and when  
55 germ cells acquire markers of differentiation (Cinquin et al., 2010), though germ cell cycle also  
56 influences the timing of differentiation (Fox and Schedl, 2015). Our recent work (Gordon et al., 2020)

57 reported that the position of Sh1 coincides with *sygl-1* promoter's expression boundary on one side  
58 and the accumulation of the meiotic entry protein GLD-1 on the other, consistent with the hypothesis  
59 that the distal edge of Sh1 falls at the boundary of that stem-like cell population, ~30  $\mu\text{m}$  from the  
60 distal end of the gonad.

61  
62 We undertook a functional test of this hypothesis. We predicted that the distal edge of Sh1 would  
63 extend over the germ cell population just outside the niche, observed as the transition in germ cell  
64 nuclear morphologies characteristic of *emb-30(tn377)* mutants at the restrictive temperature that  
65 arrest at the metaphase/anaphase transition, or the pachytene crescents of meiosis I in *glp-1(bn18)*  
66 mutants at the restrictive temperature. Furthermore, we predicted that the position of the Sh1 cell  
67 would be unaffected by these alleles, reasoning that the Sh1 cells sit atop a more-differentiated set of  
68 proliferative zone cells, and these germ cells simply differentiate in place under Sh1 when the  
69 mutants are placed at the restrictive temperature.

70  
71 As predicted, we found that the *emb-30* and *glp-1* temperature sensitive loss of function alleles at the  
72 restrictive temperature reveal that the Sh1 cells directly abut the stem-like germ cell population, but  
73 the alleles do not affect the position of Sh1 (Figure 1). Results from these temperature sensitive  
74 mutants confirm what the markers of germ cell fate revealed in Gordon et al. (2020), which is that the  
75 Sh1 cell associates with germ cells in the proliferative zone that have left the stem cell niche and are  
76 on the path to differentiation, while the stem-like germ cells lie immediately distal to the Sh1 cell at its  
77 interface with the DTC.

78  
79 Different endogenously tagged membrane proteins reveal a distal position of Sh1  
80 These experiments made use of the endogenously N-terminal tagged *inx-8(qy78[mKate::inx-8])* and  
81 *inx-9(qy79[GFP::inx-9])* alleles (Figure 2A and B) generated by (Gordon et al., 2020). Both tagged  
82 alleles are highly specific for the somatic gonad throughout development; in the adult, their  
83 expression differentiates, with INX-8 signal diminishing from the DTC and INX-9 signal persisting (see  
84 white DTC outline in Figure 1D). We have since been looking for additional endogenous fluorescent-  
85 protein-tagged alleles that show expression in the gonadal sheath cells and localize in or near the cell  
86 membrane. One of these, *ina-1(qy23[ina-1::mNeonGreen])* (Figure 2C) was briefly reported in  
87 (Gordon et al., 2020). We found another that marks the sheath, *cam-1(cp243[cam-  
88 1::mNeonGreen])*(Heppert et al., 2018) (Figure 2D). Widely expressed proteins found in the gonadal  
89 sheath and in the underlying germ cells or overlying body wall muscle cells (e.g. *arx-2*, *cdc-42*, *sdn-1*)  
90 are difficult to resolve at the gonad surface. For both tagged innexins, as well as *ina-1::mNG* and  
91 *cam-1::mNG*, we find that the Sh1 cell has a distal boundary that either displays a measurable  
92 interface with the DTC or is so located as to be consistent with such a boundary (where the DTC is  
93 not marked by the endogenous protein). The position of this boundary (~25-40  $\mu\text{m}$ , or 5-8 germ cell  
94 diameters) coincides with the domain in which germ cells leave the stem cell niche (Lee et al., 2019)  
95 (Figure 2E). We have not yet found a counterexample of an endogenously tagged, membrane-  
96 associated protein in Sh1 that demarcates an apparent Sh1 cell boundary at a great distance from  
97 the distal end of the gonad in young adults.

98  
99 Overexpressed transgenic markers vary in distal position and expression levels  
100 Three integrated array transgene markers that drive overexpression of fluorescent proteins in the  
101 sheath were also analyzed. The first is a *lim-7* promoter-driven cytoplasmic GFP that was used to  
102 label the Sh1 cell in a foundational study of the *C. elegans* hermaphrodite gonad, *tnIs6[lim-7::GFP]*  
103 (Hall et al., 1999) (Figure 2F). The second is a *lim-7* promoter-driven functional cell death receptor  
104 tagged with GFP, *bcls39[lim-7p::ced-1::GFP]* (Zhou et al., 2001), which is the basis of a recent study  
105 that reports a more proximal boundary of Sh1 (Figure 2G, strain DG5020 (Tolkin et al., 2021)). The  
106 third is a *lim-7* promoter-driven membrane-localized GFP made by us to mark the sheath cell  
107 membrane without tagging an endogenous protein, *rlmIs5[lim-7p::GFP::CAAX]* (Figure 2H). The  
108 range of the distal edge of GFP localization for all three strains overlaps with what we observed for  
109 the four endogenously tagged proteins, but are far more variable, as overexpressed transgenes are  
110 known to be (Evans, 2006) (Figure 2E-H, and Figure 2 Supplement 1).

111  
112 To untangle this variance, we examined individual worms for evidence of a DTC-Sh1 interface. About

113 half of the scoreable *lim-7p::ced-1::GFP* gonads (strain DG5020) show a DTC-Sh1 interface, and half  
114 show a bare region (Figure 3A). We further broke down this dataset by fluorescence intensity of distal  
115 CED-1::GFP signal. Strikingly, among animals under a threshold of expression intensity of ~400 A.U.  
116 (less than 1/3 as bright as the brightest GFP samples), the incidence of a DTC-Sh1 interface was  
117 100% (10/10, as opposed to 15/30 for the whole dataset). On the other extreme, gonads with  
118 stronger CED-1::GFP signal were more likely to have a farther proximal boundary of CED-1::GFP  
119 localization. In samples for which CED-1::GFP signal terminates at a great distance from the distal  
120 end of the gonad, there are two possible explanations. Either in those animals, the Sh1 position is  
121 farther distal than in animals with other markers, or else CED-1::GFP fails to localize to the edge of  
122 the Sh1 cell pair.

123  
124 *Expression differences between Sh1 cells in a pair can conceal distal extent of the sheath*  
125 We observed a pattern in a subset of gonads where the two Sh1 cells of a pair had dramatically  
126 different levels of CED-1::GFP signal, and these cells had different terminal positions on the distal-  
127 proximal axis (Figure 3B and 3B'). Exposure time and excitation laser power during image acquisition  
128 and subsequent scaling of the resulting image determine whether or not the signal in the lowly  
129 expressing cell is readily apparent (Figure 3B vs 3B'). In some cases, the brightness of the other Sh1  
130 cell and the nearby proximal gonad makes the dimmer Sh1 cell nearly impossible to detect. Variable  
131 expression levels and even complete silencing of *C. elegans* transgenes are well-known phenomena  
132 (Evans, 2006). It was not known, however, that the two Sh1 cells of a pair could assume such  
133 different configurations over the distal germline (Figure 3C, and see Figure 2H for the same pattern in  
134 the *lim-7p::GFP::CAAX* transgenic strain).

135  
136 The Sh1 positions become even more clear when *lim-7p::ced-1::GFP* is coexpressed with the mKate-  
137 tagged innexin *inx-8(qy78)* in strain DG5131 (Figure 3D and 3E). These markers colocalize in a  
138 substantial fraction of animals, as has been reported recently ((Tolkin et al., 2021), see Figure 2  
139 Supplement 2 therein). In the animals that have a discrepancy between GFP and mKate localization  
140 in Sh1, the difference in expression reveals an unexpected cell boundary between the two Sh1 cells.  
141 We imaged 19 gonads from the coexpressing strain DG5131 through their full thickness. Of those,  
142 4/19 had severe gonad morphology defects (see next section). Of the 15 morphologically normal  
143 gonads, 6/15 had discrepancies in CED-1::GFP and mKate::INX-8 signal. In 3/6 such cases, one Sh1  
144 cell makes up the entire DTC-Sh1 interface, with the other terminating at a greater distance from the  
145 distal end. Fluorescence signal from mKate::INX-8 alone does not allow these cell borders to be  
146 detected because that marker is more consistently expressed across the Sh1 cells (Figure 3F).

147  
148 The variability of the *lim-7p::ced-1::GFP* transgene allowed us to perform something like a mosaic  
149 analysis when the two Sh1 cells have very different expression levels but the dimmer cell is still  
150 visible (N=31/53 morphologically normal DG5020 gonads imaged to full depth, Figure 3 Supplement  
151 1A-D). Where the borders of the two Sh1 cells can be distinguished, one cell extends at least 20  $\mu\text{m}$   
152 farther distal than the other in 23/31 cases; five additional gonads have expression in only one Sh1  
153 cell that terminates at a great distance (>70  $\mu\text{m}$ ) from the distal end. The edges of dimly expressing  
154 Sh1 cells can be difficult to resolve. A similar phenomenon was observed when the cytoplasmic GFP  
155 of *tnls6[lim-7p::GFP]* was coexpressed with *qy78[mKate::inx-8]* ((Gordon et al., 2020) Figure 1  
156 Supplement 1 therein). Of note, the N-terminal mKate::INX-8 and GFP::INX-9 tags are most likely  
157 extracellular based on the innexin-6 channel structure determined by cryo-EM (Oshima et al., 2016),  
158 so there is reason to suspect their localization at the cell membrane will be regulated differently than  
159 that of intracellular GFPs.

160  
161 Additionally, we noticed that in DG5131 gonads where the two Sh1 cells have very different CED-  
162 1::GFP expression levels, sometimes mKate::INX-8 is missing from the membrane in Sh1 cells with  
163 strong CED-1::GFP signal (Figure 3 Supplement 1E and 1F). Subtracting background, we find that  
164 there is a 50% reduction in tagged INX-8 in such membrane regions. Since mKate::INX-8 is a  
165 genomically encoded, functional protein, such disruption likely impacts endogenous protein function.  
166 This observation hints at a synthetic interaction between the two fluorescent sheath membrane  
167 proteins.

168

169 Overexpression of CED-1::GFP transgene is correlated with gonad abnormalities

170 We therefore asked whether there was further evidence of a synthetic interaction between *lim-*  
171 *7p::ced-1::GFP* and *inx-8(qy78)*. First, we found evidence that suggests that *lim-7p::ced-1::GFP* is  
172 damaging to the animals with or without *qy78*. In the strain that expresses *lim-7p::ced-1::GFP* and not  
173 *qy78* (strain DG5020), roughly 20% of the animals had profound gonad migration defects in one  
174 gonad arm (Figure 4A, 4C). This was the case in two parallel lineages we revived, both before and  
175 after several generations of passaging without starvation or crowding on the plates. We also observe  
176 such defects in the DG5131 strain that combines *qy78[mKate::inx-8]* with the *lim-7p::ced-1::GFP*  
177 transgene (Figure 4B, 4/19 or 21% of animals), so we cannot attribute this defect to a spontaneous  
178 mutation arising in a single population in transit. We have not observed such morphological defects in  
179 the original strain bearing *qy78*, nor in any other strain we have studied. The *lim-7p::ced-1::GFP*  
180 transgene seems to sensitize worms for gonad morphology defects.

181  
182 Whether or not overexpressed CED-1::GFP also disrupts the localization of untagged innexin proteins  
183 or other endogenous sheath membrane proteins as it does the tagged mKate::INX-8, and whether  
184 such disruption explains the gonad migration defects we observe for this allele, we currently cannot  
185 say. In many of these *qy78; lim-7p::ced-1::GFP* coexpressing animals (strain DG5131), the intensity  
186 of CED-1::GFP is notably low (Figure 4D). Lower expression levels of the CED-1::GFP fusion protein,  
187 with or without *qy78* in the background, appear more likely to reveal the distal Sh1 cell. This could  
188 either be because the absence of competing bright signal makes it easier to detect dimly expressing  
189 distal Sh1, or because high levels of the transgene product are not tolerated in the distal Sh1 cell.  
190 The overexpression of the functional cell death receptor CED-1, and not just the overexpressed  
191 membrane-localized GFP, could also contribute to the defects observed in this strain. We sometimes  
192 observe abnormal sheath membrane protrusions that may result from aberrant engulfment of distal  
193 germ cells by the sheath (Figure 4E).

194  
195 The discrepancy in apparent Sh1 position when two Sh1 cells express different amounts of CED-  
196 1::GFP and when of CED-1::GFP is coexpressed with mKate::INX-8 provides definitive evidence that  
197 CED-1::GFP sometimes fails to label the entire distal sheath (the same phenomenon is reported in  
198 Figure 2 Figure Supplement 2B in the recent study (Tolkin et al., 2021)). Furthermore, the defects  
199 caused in gonads overexpressing this functional cell death receptor suggests its localization to the  
200 Sh1 membrane at high levels is not well-tolerated. We therefore conclude that *lim-7p::ced-1::GFP* is  
201 an unacceptable marker of distal Sh1.

202  
203 Assessing sheath markers for evidence of gonad disruption—Brood size

204 Just because *lim-7p::ced-1::GFP* is a poor marker of the distal sheath does not, however, relieve  
205 concerns that the endogenously tagged innexins mKate::INX-8 and GFP::INX-9 are altering the  
206 gonad. A control for tagged innexin function was originally carried out (Gordon et al., 2020). Briefly, a  
207 careful genetic analysis (Starich et al., 2014) reported that the single mutant *inx-9(ok1502)* is fertile,  
208 but the *inx-8(tn1474); inx-9(ok1502)* double mutant is sterile. Therefore, attempts to use  
209 CRISPR/Cas9 introduce a fluorescent tag in the *inx-8* locus were first performed in the *inx-9(ok1502)*  
210 background, and only once a fertile edited strain was recovered was the same edit introduced into the  
211 otherwise wild-type genetic background. We conducted brood size assays for strains discussed in  
212 this study, including the DG5131 strain containing both *lim-7p::ced-1::GFP* and the tagged innexin  
213 *qy78[mKate::inx-8]* that was imaged and analyzed by (Tolkin et al., 2021) but not assayed for brood  
214 size (Table 1).

215 **Table 1. Brood size assays.**

| Full genotype                                                                                                     | Strain name | Brood Size <sup>a</sup> | Reduction vs. N2 (%) | Embryonic Lethality (%) |
|-------------------------------------------------------------------------------------------------------------------|-------------|-------------------------|----------------------|-------------------------|
| wild type                                                                                                         | N2          | 295 ± 39 (n=57)         | NA                   | NA <sup>b</sup>         |
| <i>inx-9(qy79[GFP::<i>inx-9</i>]);<i>nasi2</i><sup>c*</sup></i>                                                   | KLG019      | 226 ± 22 (n=13)         | 23%                  | 41 ± 8%                 |
| <i>inx-8(qy78[mKate::<i>inx-8</i>]);<i>cpls122</i><sup>*</sup></i>                                                | NK2571      | 220 ± 41 (n=15)         | 25%                  | 8 ± 5%                  |
| <i>bcls39[<i>lim-7p</i>::<i>ced-1</i>::GFP];<i>nals37</i><sup>*</sup></i>                                         | DG5020      | 202 ± 29 (n=12)         | 32%                  | 20 ± 14%                |
| <i>inx-8(qy78[mKate::<i>inx-8</i>]);<i>bcls39[<i>lim-7p</i>::<i>ced-1</i>::GFP];<i>nals37</i><sup>*</sup></i></i> | DG5131      | 187 ± 45 (n=14)         | 37%                  | 18 ± 11%                |
| <i>cam-1(cp243[<i>cam-1</i>::mNG])</i>                                                                            | LP530       | 260 ± 31 (n=10)         | 12%                  | NA                      |
| <i>ina-1(qy23[<i>ina-1</i>::mNG])</i>                                                                             | NK2324      | 237 ± 37 (n=8)          | 20%                  | NA                      |

216  
 217 <sup>a</sup>Viable offspring that hatch from a single parent  
 218 <sup>b</sup>N2 numbers come from multiple trials, not all of which counted negligible numbers of dead embryos,  
 219 including the trial in which *ina-1(qy23)* and *cam-1(cp243)* were counted.

220 <sup>c</sup>*qy79[GFP::*inx-9*]* allele in strains NK2572 and NK2573 from (Gordon et al., 2020) with germ cell  
 221 nuclear marker *naSi2*; this combination of alleles was used in the cross to *glp-1(bn18)* in Figure 1D.  
 222 \*full transgene descriptions in Methods for germ cell (*naSi2*) and DTC (*cpls122*, *nals37*) markers  
 223

224 We find reductions in brood size for all of the strains under investigation, including a reduced brood  
 225 size and high embryonic lethality in two strains (DG5020 and DG5131) carrying the *lim-7p::ced-*  
 226 *1::GFP* transgene. Interestingly, despite being genetically redundant genes (Starich et al., 2014)  
 227 tagged in highly similar ways, and having similar live brood sizes, our endogenously tagged *inx-*  
 228 *8(qy78)* and *inx-9(qy79)* strains had dramatically different degrees of embryonic lethality, with *qy79*  
 229 producing over 150 unhatched eggs per worm.

230  
 231 Recent work describes brood sizes for a strong loss of function *inx-8* allele in the *inx-9(ok1502)*  
 232 mutant background (brood size of 0), and its suppressors, which range from minor rescue from  
 233 complete sterility to near wild-type brood sizes (Starich and Greenstein, 2020). This work refers to  
 234 brood sizes of 256+/- 51 as “nearly wild-type”. Based on this threshold, we make the assessment that  
 235 all of the fluorescently marked strains have mildly to moderately reduced brood sizes. On the basis of  
 236 brood size alone, there is not a strong reason to prefer one of these markers over another.  
 237

238 Notably, the more severe brood size defect and high incidence of embryonic lethality observed by  
 239 (Tolkin et al., 2021) for *inx-8(qy78)* were not observed either in this brood size assay, nor in prior  
 240 ones conducted in our lab, nor during routine work with this allele over the past several years.  
 241 However, the DG5131 strain combining *qy78* with *lim-7p::ced-1::GFP* did have a more severe brood  
 242 size defect and greater embryonic lethality than the parent *qy78* strain (15% reduction), further  
 243 suggesting that the defects observed for the *qy78* allele by (Tolkin et al., 2021) depend strongly on  
 244 the presence of the *lim-7p::ced-1::GFP* in the genetic background.  
 245

#### 246 Assessing sheath markers for evidence of gonad disruption—Proliferative zone

247 Because brood size is an emergent property of many gonad, germline, embryonic, and systemic  
 248 processes (including gonadogenesis, stem cell maintenance, regulation of meiosis, spermatogenesis,  
 249 oogenesis, metabolism, ovulation, and embryogenesis), defects in brood size are not a direct proxy  
 250 for dysregulation of the germ line proliferative zone. We therefore turned our attention back to the  
 251 distal gonad and asked whether the strains with fluorescent sheath markers have abnormalities in the

252 length of their proliferative zones (as measured by DAPI staining of germ cell nuclei to detect and  
253 measure the length of the germ line distal to crescent shaped nuclei of meiosis I, (Hubbard, 2007))  
254 (Figure 5). The strain with the tagged innexin *inx-8(qy78)* and DTC marker shown in previous figures  
255 has a normally patterned distal germ line (average length of 111  $\mu\text{m}$ , or  $\sim$ 22 germ cell diameters) that  
256 is indistinguishable from wild type N2 (Figure 5A, B, and E). Excluding worms with gross morphology  
257 defects, the DG5020 strain bearing a DTC marker and *lim-7p::ced-1::GFP* (Tolkin et al., 2021) also  
258 has a normal distal germ line (average of 98  $\mu\text{m}$ , or  $\sim$ 20 germ cell diameters, a difference from wild  
259 type that is statistically but likely not biologically significant, Figure 5C and E). However, in the  
260 DG5131 strain that combines these alleles, the distal germ line is notably shortened (average of 68  
261  $\mu\text{m}$  or  $\sim$ 13 germ cell diameters, Figure 5D and E). This is comparable to the *glp-1(bn18)* allele at the  
262 permissive temperature shown in Figure 1E. Abnormal distal gonad patterning provides further  
263 evidence that a synthetic interaction between the *lim-7p::ced-1::GFP* transgene and the *qy78* allele—  
264 not the *qy78* allele alone—is responsible for the shorter proliferative zone observed for strain DG5131  
265 in a recent study (Tolkin et al., 2021).

266  
267 In the end, we find that only the strain combining *inx-8(qy78)* and *lim-7p::ced-1::GFP* has a  
268 proliferative zone shorter than the wild-type. The moderate brood size defects shown by all strains  
269 could be caused by numerous processes outside of stem cell regulation. For example, we find the  
270 hypothesis of (Tolkin et al., 2021) based on the findings of (Starich et al., 2020, 2014), that a major  
271 role of *inx-8/9* is in the proximal gonad regulating the provisioning of oocytes with essential  
272 metabolites, to be compelling. This hypothesis also has support from the large number of unhatched  
273 eggs observed for *inx-9(qy79[GFP::inx-9])*. Thus, we conclude with the observation that endogenous,  
274 fluorescently tagged sheath membrane proteins consistently mark both of the distal Sh1 cells without  
275 measurably impairing distal gonad function, and should be the reagents of choice for live-imaging in  
276 this cell type. They also consistently report a distal Sh1 position adjacent to the stem cell zone, as we  
277 previously found (Gordon et al., 2020).

## 278 Discussion

279 We discovered that the distal position of Sh1 is much closer to the distal end of the young adult  
280 hermaphrodite gonad than was previously observed, where it forms an interface with the DTC's  
281 proximal projections and overlaps substantially with the proliferative zone of the germline where  
282 mitotic cell divisions occur (Gordon et al., 2020). We have now confirmed this finding with functional  
283 manipulations of germ cell cycling and cell fate. We observed a distal Sh1 position in other strains  
284 with endogenously tagged sheath cell membrane proteins that act in molecular pathways outside of  
285 gap junctional coupling, and in a substantial fraction of traditional transgenic animals expressing *lim-7*  
286 promoter-driven CED-1::GFP, GFP::CAAX, and cytoplasmic GFP (though these strains have high  
287 variability in fluorescence intensity and localization). Therefore, we consider the results presented  
288 here to be confirmatory of the foundational finding of (Gordon et al., 2020), which is that almost all  
289 mitotic germ cells in the adult hermaphrodite contact the DTC or Sh1, with a noteworthy population in  
290 contact with both. Other recent work suggests a role for the sheath cells in promoting adult germ cell  
291 proliferation, specifically through modulation of Notch receptor *glp-1* expression (Gopal et al., 2020).  
292 We focus especially on young adults in these studies (less than 24 hours post mid-L4, see Methods).  
293 An important caveat to the work is that the gonad is dynamic and cell shapes and positions change  
294 over time. Indeed, dynamic processes could lead to the surprising difference in position often seen  
295 between the two Sh1 cells in a single gonad arm, with one Sh1 cell growing more actively over germ  
296 cells as they leave the niche. The high variability of an overexpressed *lim-7p::ced-1::GFP* transgene  
297 has allowed for this surprising discovery, though that variability makes it a poor marker of the  
298 absolute position of the Sh1 cells, and it sometimes causes gonad defects.

300  
301 In physics, the observer effect states that it is impossible to observe a system without changing it. In  
302 biological imaging in *C. elegans*, this means that we can either observe wild-type animals that are  
303 dead, dissected and/or fixed and coated or stained, or we can observe genetically modified animals  
304 that are alive. Some fine, membranous cellular structures do not survive fixation (Gerdes et al., 2013;  
305 Kornberg and Roy, 2014). On the other hand, any genomic modification runs the risk of altering an  
306 animal's physiology.

307

308 We feel most confident examining endogenously tagged gene products for several reasons. First,  
309 proteins expressed at physiological levels are less likely to directly damage a cell vs. overexpressed  
310 fluorescent proteins (Kintaka et al., 2016). Second the ability to cross-reference among strains with  
311 different tagged proteins that act in different molecular pathways allows us to use concordant results  
312 in reconstructing cell positions; any single marker may or may not localize to the region of interest,  
313 but concordant results among independent experiments help construct an accurate picture of the cell.  
314 One factor to consider, however, is that not every endogenously expressed protein is likely to localize  
315 evenly across all regions of a cell. We would expect in a large cell like Sh1 that interacts with germ  
316 cells in many stages of maturation that some cell-surface proteins would be regionalized (and indeed  
317 we occasionally see a pattern suggestive of a diffusion barrier in the membrane of Sh1, Figure 2  
318 Supplement 1G). Along those lines, it seems likely that the Sh1 cells might have mechanisms to  
319 exclude the cell death receptor CED-1 from the cell membrane domain that contacts proliferating  
320 germ cells. The *bcls39* transgene is typically used to study engulfment of apoptotic germ cell corpses  
321 at the proximal end of Sh1 and rescues *ced-1* loss of function mutants for apoptotic germ cell corpse  
322 engulfment (Zhou et al., 2001). We find this marker to be unreliable in the distal region of the cell, and  
323 to cause gonad defects especially but not only when combined with endogenously tagged *inx-*  
324 *8(qy78)*. A recent study (Tolkin et al., 2021) uses this transgene in all of the backgrounds analyzed  
325 (sometimes detecting the CED-1::GFP by anti-GFP antibody staining, which appears to amplify the  
326 variability of the marker), so we find this problematic reagent to undermine that study's conclusions.

327  
328 The need for caution when observing and interpreting endogenously tagged fluorescent proteins is  
329 noted. Several steps can and should be taken to increase confidence that a tagged protein is not  
330 causing cryptic or unwanted phenotypes. First, multiple edited lines should be recovered and  
331 outcrossed, thereby reducing the likelihood that a phenotype is caused by off-target Cas9 cutting  
332 creating lesions in any individual edited genome. Second, brood size should be estimated either by  
333 timed food depletion (less rigorous) or formal brood size assays (more rigorous). Third, edited lines  
334 should be examined for known phenotypes caused by loss of function of the targeted genes. This can  
335 be done, in order of least to most rigorous, by consulting the literature, by comparing to RNAi  
336 treatments or known mutants, and finally by introducing AID tags and using the degron strategy to  
337 deplete the gene product under the lab's exact experimental conditions of choice (Zhang et al., 2015),  
338 however this step will not work for extracellular tags. Finally, any "markers" used should be assessed  
339 on their own for the phenotype of interest. Even with these controls in place, synthetic interactions  
340 can emerge between "markers" and alleles, including tagged proteins of interest. These interactions  
341 can themselves reveal biologically relevant phenomena, but only if they are recognized.

342  
343 In the end, no transgenic or genome-edited strain is wild type, and it should be our expectation that  
344 such strains might be somewhat sensitized as a result. The perfect reagent does not exist. Therefore,  
345 we trust congruent results among a set of independent reagents with non-overlapping weaknesses.  
346 Finally, we can formulate questions narrowly enough that, despite their shortcomings, our imperfect  
347 reagents are adequate to help answer them. In the future, new endogenously tagged alleles that are  
348 expressed in the sheath, single-copy, membrane-localized transgenes that do not affect distal gonad  
349 patterning, and different imaging modalities like electron microscopy will shed more light on the  
350 complex relationship between the gonadal sheath and the germ line. At the present time, however,  
351 we consider the existence of an interface between the DTC and Sh1 cells that coincides with the  
352 boundary of the distal-most stem-like germ cells to be supported by the preponderance of evidence.

### 353 **Acknowledgements**

354 We thank T. Tolkin, A. Mohammed, T. Starich, T. Schedl, J.A. Hubbard, and D. Greenstein for  
355 sharing their manuscript and strains DG5020 (combining published alleles *bcls39* (Zhou et al., 2001),  
356 and *nals37* (Pekar et al., 2017) and DG5131 (combining published alleles *qy78* (Gordon et al., 2020),  
357 *bcls39* (Zhou et al., 2001), and *nals37* (Pekar et al., 2017)). We thank D. Greenstein and the CGC for  
358 the temperature sensitive mutant strains and B. Goldstein for LP530. We are grateful for helpful  
359 conversations with D. Sherwood and other colleagues.  
360

## 361 **References**

- 362 Cinquin O, Crittenden SL, Morgan DE, Kimble J. 2010. Progression from a stem cell-like state to early  
363 differentiation in the *C. elegans* germ line. *Proc Natl Acad Sci U S A* **107**:2048–53.  
364 doi:10.1073/pnas.0912704107
- 365 Evans TC. 2006. Transformation and Microinjection In: WormBook, editor. The *C. Elegans* Research  
366 Community, WormBook.
- 367 Fox PM, Schedl T. 2015. Analysis of Germline Stem Cell Differentiation Following Loss of GLP-1  
368 Notch Activity in *Caenorhabditis elegans*. *Genetics* **201**:167–84.  
369 doi:10.1534/genetics.115.178061
- 370 Gerdes H-H, Rustom A, Wang X. 2013. Tunneling nanotubes, an emerging intercellular  
371 communication route in development. *Mech Dev* **130**:381–387. doi:10.1016/J.MOD.2012.11.006
- 372 Gopal S, Amran A, Elton A, Ng L, Pocock R. 2020. Notch-Directed Germ Cell Proliferation Is  
373 Mediated by Proteoglycan-Dependent Transcription. *bioRxiv* 2020.07.30.229997.  
374 doi:10.1101/2020.07.30.229997
- 375 Gordon KL, Zussman JW, Li X, Martin CM, Sherwood DR. 2020. Stem cell niche exit in *C. elegans*  
376 via orientation and segregation of daughter cells by a cryptic cell outside the niche. *Elife*  
377 **9**:e56383. doi:DOI: 10.7554/eLife.56383
- 378 Hall DH, Winfrey VP, Blaeuer G, Hoffman LH, Furuta T, Rose KL, Hobert O, Greenstein D. 1999.  
379 Ultrastructural features of the adult hermaphrodite gonad of *Caenorhabditis elegans*: Relations  
380 between the germ line and soma. *Dev Biol* **212**:101–123.
- 381 Henderson ST, Gao D, Lambie EJ, Kimble J. 1994. *lag-2* may encode a signaling ligand for the GLP-  
382 1 and LIN-12 receptors of *C. elegans*. *Development* **120**:2913–24.
- 383 Heppert JK, Pani AM, Roberts AM, Dickinson DJ, Goldstein B. 2018. A CRISPR Tagging-Based  
384 Screen Reveals Localized Players in Wnt-Directed Asymmetric Cell Division. *Genetics*  
385 **208**:1147–1164. doi:10.1534/GENETICS.117.300487
- 386 Hubbard EJA. 2007. *Caenorhabditis elegans* germ line: a model for stem cell biology. *Dev Dyn*  
387 **236**:3343–57. doi:10.1002/dvdy.21335
- 388 Killian DJ, Hubbard EJA. 2005. *Caenorhabditis elegans* germline patterning requires coordinated  
389 development of the somatic gonadal sheath and the germ line. *Dev Biol* **279**:322–335.  
390 doi:10.1016/j.ydbio.2004.12.021
- 391 Kintaka R, Makanae K, Moriya H. 2016. Cellular growth defects triggered by an overload of protein  
392 localization processes. *Sci Reports 2016 6* **1**:1–11. doi:10.1038/srep31774
- 393 Kornberg TB, Roy S. 2014. Cytonemes as specialized signaling filopodia. *Development* **141**:729–36.  
394 doi:10.1242/dev.086223
- 395 Lee CH, Shin H, Kimble J. 2019. Dynamics of Notch-Dependent Transcriptional Bursting in Its Native  
396 Context. *Dev Cell* **50**:426-435.e4. doi:10.1016/j.devcel.2019.07.001
- 397 Oshima A, Tani K, Fujiyoshi Y. 2016. Atomic structure of the innexin-6 gap junction channel  
398 determined by cryo-EM. *Nat Commun* **7**:13681. doi:10.1038/ncomms13681
- 399 Pekar O, Ow MC, Hui KY, Noyes MB, Hall SE, Jane Albert Hubbard E. 2017. Linking the  
400 environment, DAF-7/TGF $\beta$  signaling and LAG-2/DSL ligand expression in the germline stem cell  
401 niche. *Dev* **144**:2896–2906. doi:10.1242/dev.147660
- 402 Schindelin J, Arganda-Carreras I, Frise E, Kaynig V, Longair M, Pietzsch T, Preibisch S, Rueden C,  
403 Saalfeld S, Schmid B, Tinevez J-Y, White DJ, Hartenstein V, Eliceiri K, Tomancak P, Cardona A.  
404 2012. Fiji: an open-source platform for biological-image analysis. *Nat Methods* **9**:676–682.  
405 doi:10.1038/nmeth.2019
- 406 Shin H, Haupt KA, Kershner AM, Kroll-Conner P, Wickens M, Kimble J. 2017. SYGL-1 and LST-1 link  
407 niche signaling to PUF RNA repression for stem cell maintenance in *Caenorhabditis elegans*.  
408 *PLoS Genet* **13**. doi:10.1371/journal.pgen.1007121
- 409 Starich T, Greenstein D. 2020. A Limited and Diverse Set of Suppressor Mutations Restore Function  
410 to INX-8 Mutant Hemichannels in the *Caenorhabditis elegans* Somatic Gonad. *Biomol 2020, Vol*  
411 *10, Page 1655* **10**:1655. doi:10.3390/BIOM10121655
- 412 Starich TA, Bai X, Greenstein D. 2020. Gap junctions deliver malonyl-CoA from soma to germline to  
413 support embryogenesis in *Caenorhabditis elegans*. *Elife* **9**. doi:10.7554/eLife.58619
- 414 Starich TA, Hall DH, Greenstein D. 2014. Two classes of gap junction channels mediate soma-  
415 germline interactions essential for germline proliferation and gametogenesis in *Caenorhabditis*  
416 *elegans*. *Genetics* **198**:1127–1153. doi:10.1534/genetics.114.168815



- 417 Team RDC. 2020. R: A language and environment for statistical computing.  
418 Tolkin T, Mohammed A, Starich T, Schedl T, Hubbard EJA, Greenstein D. 2021. Innexin function  
419 dictates the spatial relationship between distal somatic cells in the *Caenorhabditis elegans*  
420 gonad without impacting the germline stem cell pool. *bioRxiv* 2021.10.22.465523.  
421 doi:10.1101/2021.10.22.465523  
422 Zhang L, Ward JD, Cheng Z, Dernburg AF. 2015. The auxin-inducible degradation (AID) system  
423 enables versatile conditional protein depletion in *C. elegans*. *Dev* **142**:4374–4384.  
424 doi:10.1242/dev.129635  
425 Zhou Z, Hartweg E, Horvitz HR. 2001. CED-1 Is a Transmembrane Receptor that Mediates Cell  
426 Corpse Engulfment in *C. elegans*. *Cell* **104**:43–56. doi:10.1016/S0092-8674(01)00190-8  
427

## 428 **Methods**

### 429 **Strains**

430 In strain descriptions, we designate linkage to a promoter with a *p* following the gene name and  
431 designate promoter fusions and in-frame fusions with a double semicolon (::). Some integrated strains  
432 (*xx/ls* designation) may still contain for example the *unc-119(ed4)* mutation and/or the *unc-119* rescue  
433 transgene in their genetic background, but these are not listed in the strain description for the sake of  
434 concision, nor are most transgene 3' UTR sequences. Strains are as follows:

435  
436 NK2571 (*inx-8(qy78[mKate::inx-8]) IV; (cpls122[lag-2p::mNeonGreen:: PLC<sup>δPH</sup>]*), KLG019 (*inx-*  
437 *9(qy79[GFP::inx-9]); (naSi2(mex-5p::H2B::mCherry::nos-2 3'UTR) II*, LP530 (*cam-1(cp243[cam-*  
438 *1::mNG-C1<sup>Δ</sup>3xFlag)*, NK2324 (*ina-1(qy23[ina-1::mNG] III)*, *tnls6[lim-7p::GFP + rol686 6(su1006)] X*,  
439 *DG5020 (bcls39[lim-7p::ced-1::GFP + lin-15(+)] V; nals37[lag-2p::mCherry:: plcdeltaPH + unc-*  
440 *119(+)]*; *DG5131(inx-8(qy78[mKate::inx-8]) IV bcls39[lim-7p::ced-1::GFP + lin-15(+)] V; nals37[lag-*  
441 *2p::mCherry:: plcdeltaPH + unc-119(+)]*; KLG020 (*rlmls5[lim-7p::GFP::caax]; cpls91[lag-2p::2x*  
442 *mKate2::PLCδPH::3xHA::tbb-2 3'UTR LoxN] II)*)

443

### 444 *Staging of animals for comparisons among sheath markers*

445 We focused on young adult animals around the time egg laying commences, as in (Gordon et al.,  
446 2020). Mid L4 animals are picked from healthy, unstarved populations (which are maintained without  
447 starving for the duration of the experiment). These animals are kept at 20° C for 16-18 hours, until  
448 adulthood is reached and ovulation begins. We prefer not to age the animals much farther into  
449 adulthood for routine imaging (though we did this for the temperature shift experiments to follow  
450 previously published experimental regimes), as once a full row of embryos is present in the uterus,  
451 the distal gonads can become compressed or obscured by embryos. For strains in which a gonad  
452 migration defect is observed (DG5020, DG5131), picking animals in the L4 stage prevents bias for or  
453 against normal-looking adults (as the defects are profound enough to be visible on the dissecting  
454 scope in adults).

455

### 456 *Temperature-sensitive mutant analysis*

457 Worms from the *emb-30(tn377)* mutant genotype were grown at the permissive temperature (16° C)  
458 for 24h past L4. Plates were shifted to the restrictive temperature (25° C) for 15 h before DAPI  
459 staining, while permissive-temperature controls were maintained at 16° C for 18 h before staining  
460 (because development is proportionally slower at 16°C than at 25° C, permissive-temperature  
461 controls were cultured longer).

462

463 Worms from the *glp-1(bn18)* mutant genotype were grown at the permissive temperature of 16° C for  
464 24 h past L4. Plates were shifted to the restrictive temperature (25° C) for 6 h (Fox and Schedl,  
465 2015). Permissive-temperature controls were maintained at 16° C for 6 h. Worms were imaged live  
466 (see *Confocal imaging*, below).

467

### 468 *DAPI staining*

469 DAPI staining was done according to standard protocols, with the cold methanol fixation done for 2.5  
470 minutes and the concentration of DAPI at 10ug/ml in distilled water in the dark for five minutes,  
471 washed with 0.1% Tween in PBS. Samples were briefly stored at 4° C in 75% glycerol and imaged  
472 directly in glycerol.

473

### 474 *Confocal imaging*

475 All images were acquired on a Leica DMI8 with an xLIGHT V3 confocal spinning disk head (89 North)  
476 with a 63x Plan-Apochromat (1.4 NA) objective and an ORCA-Fusion Gen-III sCMOS camera  
477 (Hamamatsu Photonics). RFPs were excited with a 555 nm laser, GFPs were excited with a 488 nm  
478 laser, and DAPI was excited with a 405 nm laser. Worms were mounted on agar pads with 0.01M  
479 sodium azide (live) or in 75% glycerol (DAPI stained).

480

### 481 *Fluorescence intensity of lim-7p::CED-1::GFP and mKate::INX-8*

482 For quantitative comparisons of fluorescence intensity shown in Figure 3 and Figure 4, gonads were  
483 imaged with uniform laser power and exposure times with 1 micron Z-steps. Images were opened in

484 FIJI (Schindelin et al., 2012) and z-projections were made through the depth of the superficial half of  
485 the gonad (not including signal from the deep Sh1 cell if it was present). Images without any  
486 detectable Sh1 expression were discarded (2/32 images from the analysis in Figure 3A). A line ~20  
487  $\mu\text{m}$  long parallel to long axis of the gonad, terminating near the distal boundary of GFP expression,  
488 and not crossing any gaps in Sh1 revealing background was drawn, and average fluorescence  
489 intensity was measured along its length in arbitrary units.

490

#### 491 *Measurements of DTC and Sh1 positions*

492 The distal tip of the gonad was identified in the fluorescence images if the DTC was marked or in a  
493 DIC image if the DTC was not marked in a given strain. The distance from the gonad tip to the  
494 longest DTC process (when marked), and from the gonad tip to the most distal extent of Sh1 was  
495 measured in FIJI (Schindelin et al., 2012). A DTC-Sh1 interface is detected by subtracting the first  
496 value from the second value—negative numbers reflect the amount of overlap of these cellular  
497 domains across the germ line, positive numbers reflect a gap. This is a conservative estimate, as a  
498 gap of less than one germ cell diameter (~5  $\mu\text{m}$ ) would still allow germ cells to contact both the DTC  
499 and Sh1 at the same time. Min/max settings on the fluorescence images are adjusted to allow the  
500 faintest signal to be detected when measuring.

501

#### 502 *Analysis of mosaic expression*

503 The variability of the *lim-7p::ced-1::gfp* transgene allowed us to distinguish the two Sh1 cells in a pair,  
504 especially when coexpressed with *qy78[mKate::inx-8]*. For this experiment, we imaged animals  
505 through the full thickness of the distal gonad (40  $\mu\text{m}$  instead of our usual 20  $\mu\text{m}$  that captures just the  
506 superficial half of the gonad that can be imaged more clearly). Animals in which two distinct Sh1 cells  
507 had different levels of GFP signal were analyzed further for relative cell position. For DG5131, this  
508 was 6/19 samples. For DG5020, this was 31/53 samples.

509

#### 510 *Brood size assays*

511 DG5020 and DG5131 were shipped overnight on 9/23, passaged off the starved shipment plate onto  
512 fresh NGM+OP50 plates and maintained by passaging unstarved animals for 3 generations before  
513 beginning the brood size assay. For each strain, 10-15 L4 animals were singled onto NGM plates  
514 seeded with OP50 and kept in the same incubator, on the same shelf, at 20° C. The singled animals  
515 were passaged once per day on each of the following 5 days to fresh plates, with all plates  
516 maintained at 20° C. Two days after removing the parent, the plates with larval offspring were moved  
517 to 4° C for 20 minutes to cause worm motion to cease, and all larvae (and unhatched eggs when  
518 noted) were counted on a dissecting scope with a clicker by the same team of worm counters, with  
519 internal controls. Plates with unhatched eggs were examined and recounted one day later to see if  
520 any hatched. Offspring from parent worms that died or burrowed in the process were not counted.  
521 Total sample sizes and results reported in Table 1.

522

#### 523 *Distal germ line patterning*

524 Measurements were made from the distal end of the gonad to the transition zone, which is the distal-  
525 most row of germ cells with more than one crescent-shaped nucleus.

526

#### 527 *Statistical analyses*

528 Tests, test statistics, and p values given for each analysis in the accompanying figure legends. One-  
529 way ANOVA followed by Tukey's multiple comparisons test were conducted in R (R Team, 2020) or  
530 Prism (GraphPad Prism version 9.20 (283) for macOS, GraphPad Software, San Diego, California  
531 USA, [www.graphpad.com](http://www.graphpad.com)).

532

## 533 **Figures and Figure Legends**

534

### 535 **Table 1. Brood size assays.**

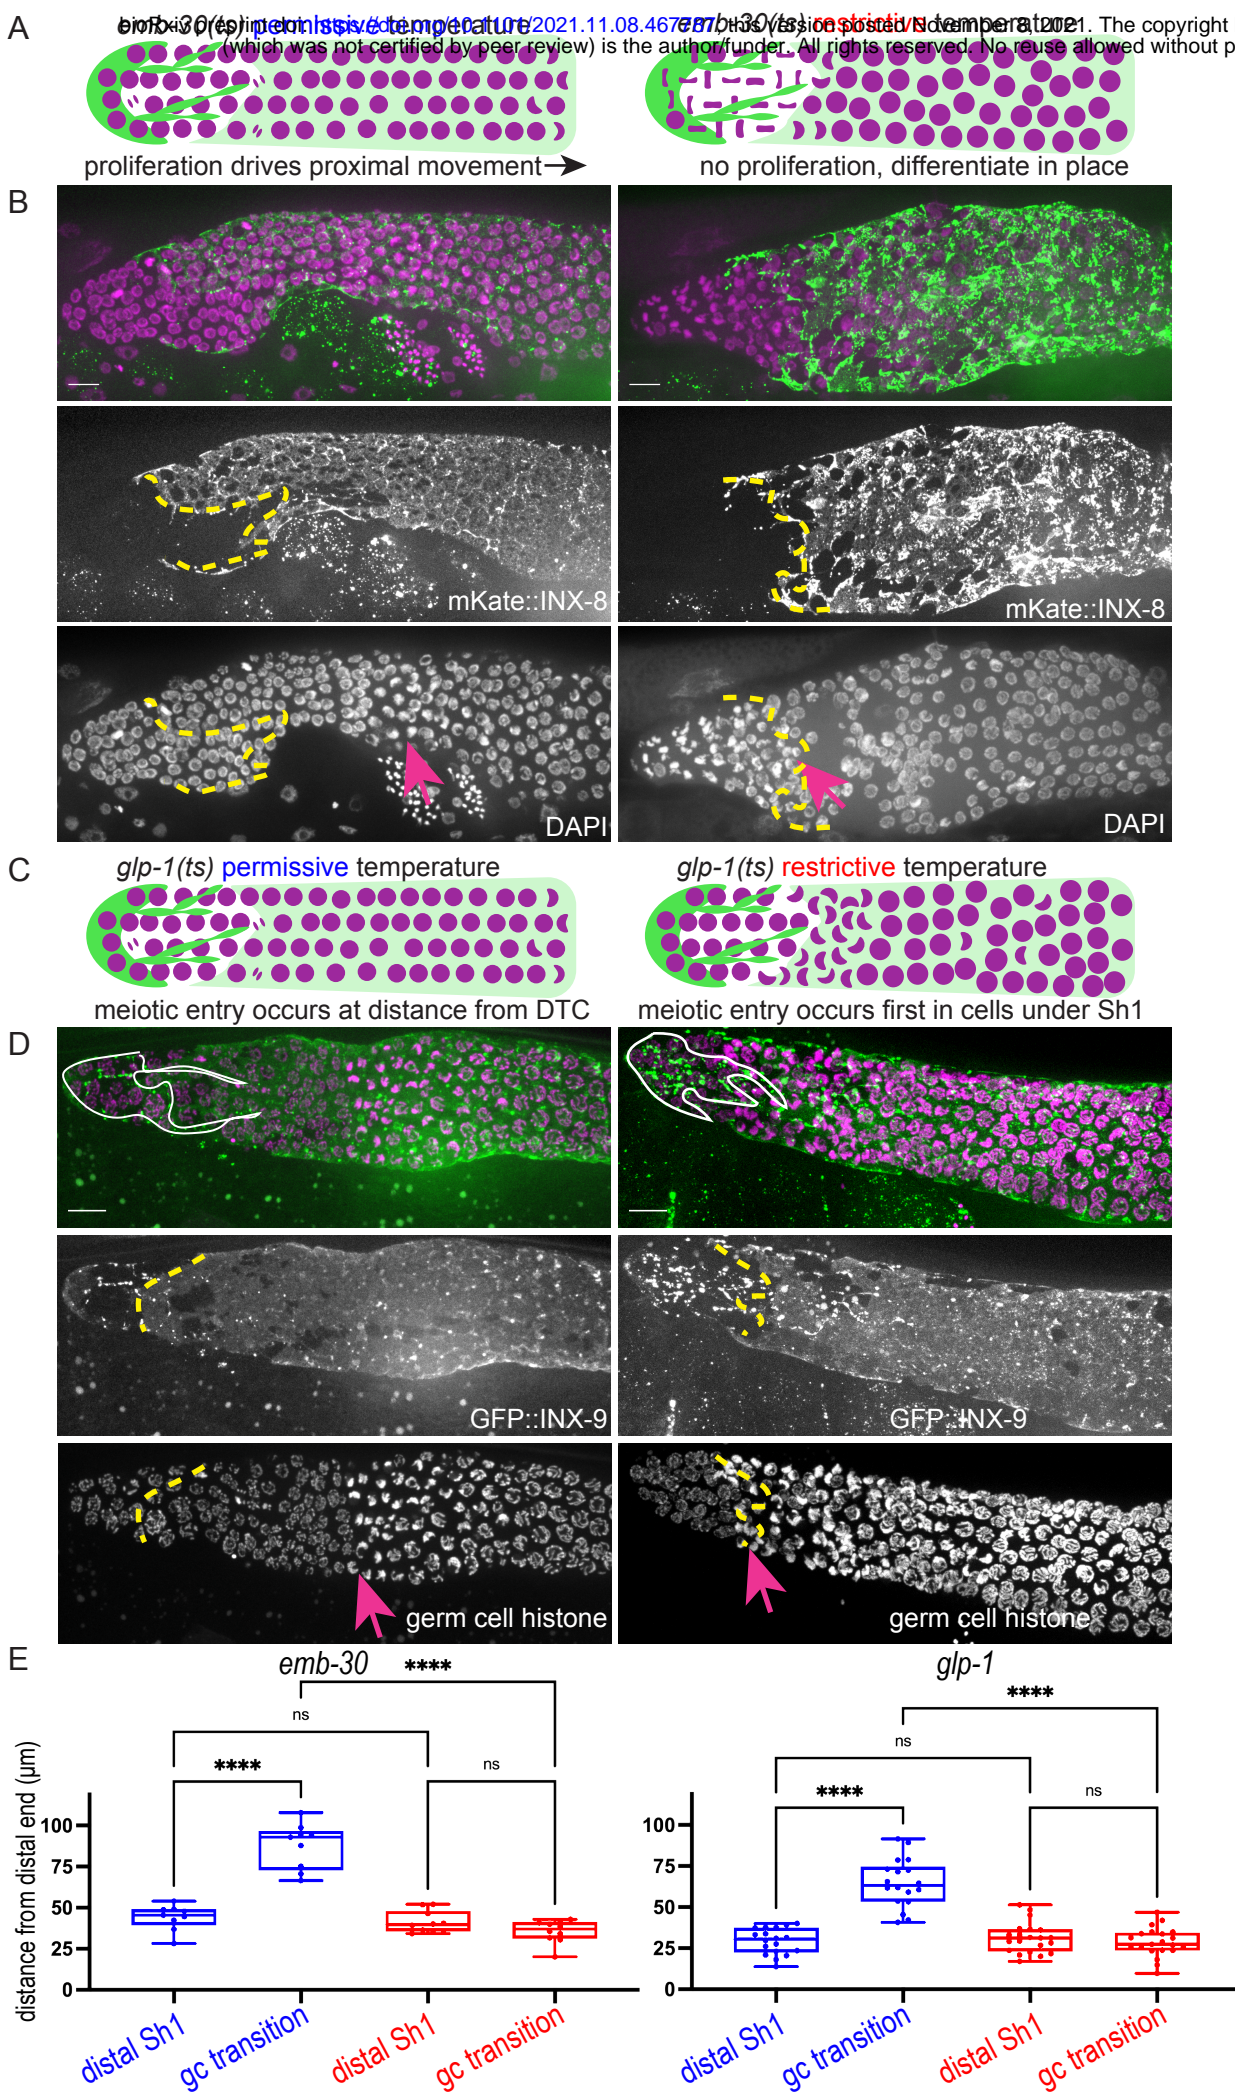

536 **Figure 1. The Sh1 cells associate with proliferative germ cells that are on the path to**  
537 **differentiation.** (A) Schematic of hypothesis for *emb-30(tn377)* experiment. Germ cell (gc) nuclei  
538 shown in magenta, somatic gonad cells shown in green (DTC) and transparent green (Sh1). (B)  
539 Gonads from worms reared at permissive (left column) and restrictive (right column) temperatures.  
540 Top, merged image. Middle, mKate::INX-8 labeling Sh1 (edge outlined with yellow dashed line).  
541 Bottom, DAPI staining labeling all nuclei with pink arrow marking gc transition and same yellow  
542 dashed line as in middle image showing Sh1 edge. (C) Schematic of hypothesis for *glp-1(ts)*  
543 experiment. (D) Gonads from permissive (left column) and restrictive (right column) temperatures.  
544 Top, merged image. Middle, GFP::INX-9 labeling DTC (outlined in white) and Sh1 (edge outlined with  
545 yellow dashed line). Bottom, germ cell histone mCherry (*naSi2[mex-5p::H2B::mCherry]*) with pink  
546 arrow showing gc transition and same yellow dashed line as in middle image showing Sh1 edge.  
547 Note that the *glp-1(bn18)* allele is not fully wild type at permissive temperatures and is known to have  
548 a shortened proliferative zone (Fox and Schedl 2015). (E) Box plots overlaid with all datapoints  
549 measuring the distal position of Sh1 and the position of the transition in germ cell nuclear  
550 morphology. Permissive temperature shown in blue; restrictive temperature shown in red. Permissive  
551 *emb-30* N=9; restrictive *emb-30* N=10. Permissive *glp-1* N=18; restrictive *glp-1* N=21. A one-way  
552 ANOVA to assess the effect of temperature on proximodistal position of gonad features was  
553 performed, and was significant for *emb-30*:  $F_{3,34}=63.00$ ,  $p<0.0001$ . Tukey's multiple comparison test  
554 found that the mean values of the positions of Sh1 and the germ cell transition were significantly  
555 different at the permissive temperature (mean difference of  $-43.4 \mu\text{m}$ , 95% CI  $-55.03 \mu\text{m}$  to  $-31.77$   
556  $\mu\text{m}$ ,  $p<0.0001$ ), but not at the restrictive temperature (mean difference of  $5.64 \mu\text{m}$ , 95% CI  $5.393 \mu\text{m}$   
557 to  $16.67 \mu\text{m}$ ,  $p=0.520$ ). The position of the germ cell transition differed at the permissive vs. restrictive  
558 temperatures (mean difference of  $51.96 \mu\text{m}$ , 95% CI  $40.63 \mu\text{m}$  to  $63.30 \mu\text{m}$ ,  $p<0.0001$ ), but the Sh1  
559 position did not (mean difference of  $2.29 \mu\text{m}$ , 95% CI  $-8.410 \mu\text{m}$  to  $14.26 \mu\text{m}$ ,  $p=0.898$ ). Similar  
560 results were obtained for *glp-1*:  $F_{3,74}=52.84$ ,  $p<0.0001$ . Tukey's multiple comparison test found that  
561 the mean values of the positions of Sh1 and the germ cell transition were significantly different at the  
562 permissive temperature (mean difference of  $-35.51 \mu\text{m}$ , 95% CI  $-44.59 \mu\text{m}$  to  $-26.43 \mu\text{m}$   $p<0.0001$ )  
563 but not at the restrictive temperature (mean difference of  $2.514 \mu\text{m}$ ,  $-5.892 \mu\text{m}$  to  $10.92 \mu\text{m}$ ,  $p=0.861$ ).  
564 The position of the germ cell transition differed at the permissive vs. restrictive temperatures (mean  
565 difference of  $36.02 \mu\text{m}$ , 95% CI  $27.27 \mu\text{m}$  to  $44.77 \mu\text{m}$ ,  $p<0.0001$ ), but the Sh1 position did not (mean  
566 difference of  $-1.997 \mu\text{m}$ , 95% CI  $-10.75 \mu\text{m}$  to  $6.753 \mu\text{m}$ ,  $p=0.9318$ ). All scale bars  $10 \mu\text{m}$ .

Figure 2

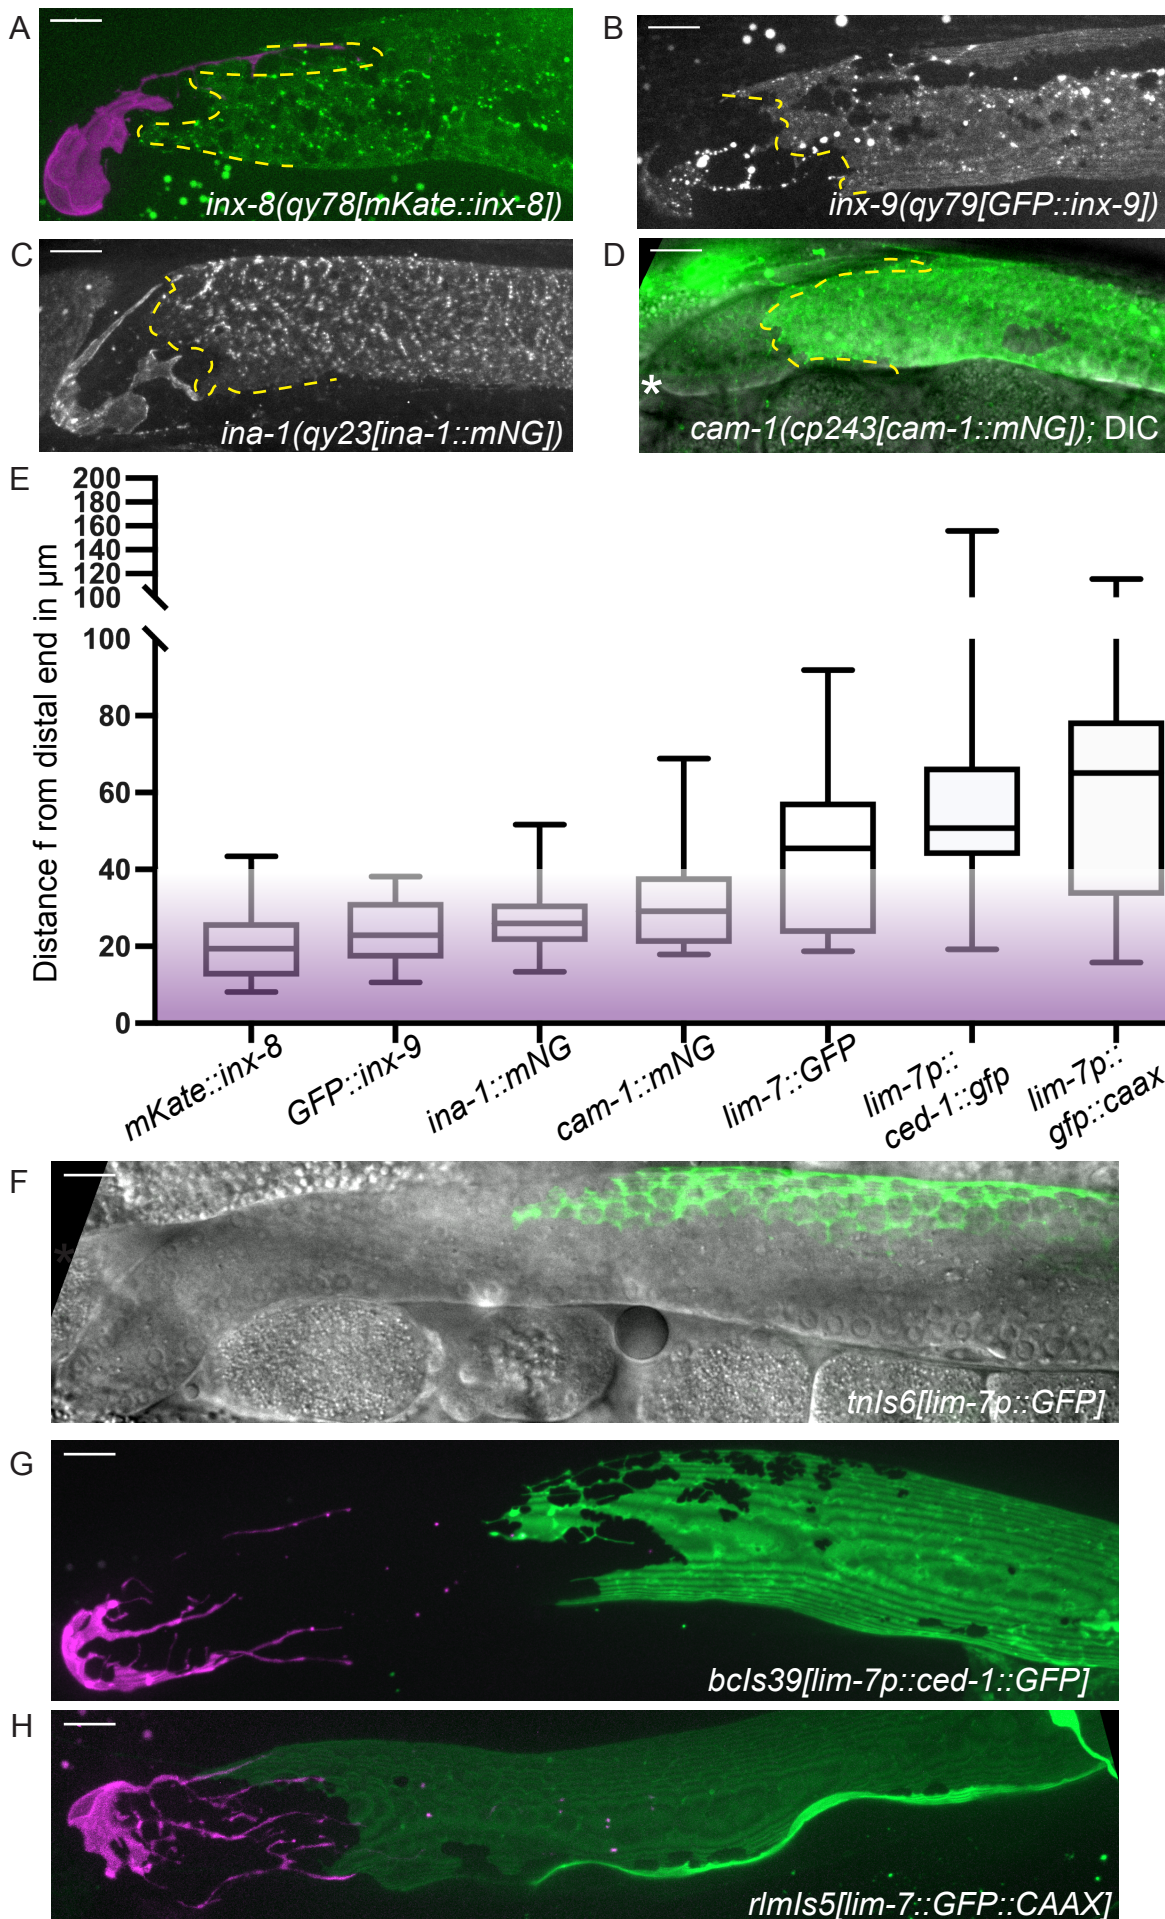

567 **Figure 2. Sheath-expressed fluorescent proteins show consistency among endogenously**  
568 **tagged membrane proteins and greater variability in overexpressed transgenes.** (A)  
569 *qy78[mKate::INX-8]; cpls122[lag-2p::mNeonGreen:: PLC<sup>5PH</sup>] N=21* (B) *qy79[GFP::inx9] N=16* (C)  
570 *qy23[ina-1::mNG] N=26* (D) *cp243[cam-1::mNG] N=21* (E) Box plots of Sh1 positions for all strains,  
571 including transgenes (F) *tnls6[lim-7p::GFP] N=20* (G) Strain DG5020 *bcls39[lim-7p::CED-1::GFP];*  
572 *nals37[lag-2p::mCherry-PH]; N=52* (note that mean and range agree with those reported in (Tolkin et  
573 al., 2021)) (H) *rlmls5[lim-7p::GFP::CAAX];cpls122 N=21*. Purple gradient marks approximate extent  
574 of stem cell zone (Lee et al., 2019; Shin et al., 2017). See Figure 2 Supplement 1 for images of  
575 minimum and maximum observed distances for all markers. All scale bars 10  $\mu\text{m}$ .

Figure 3

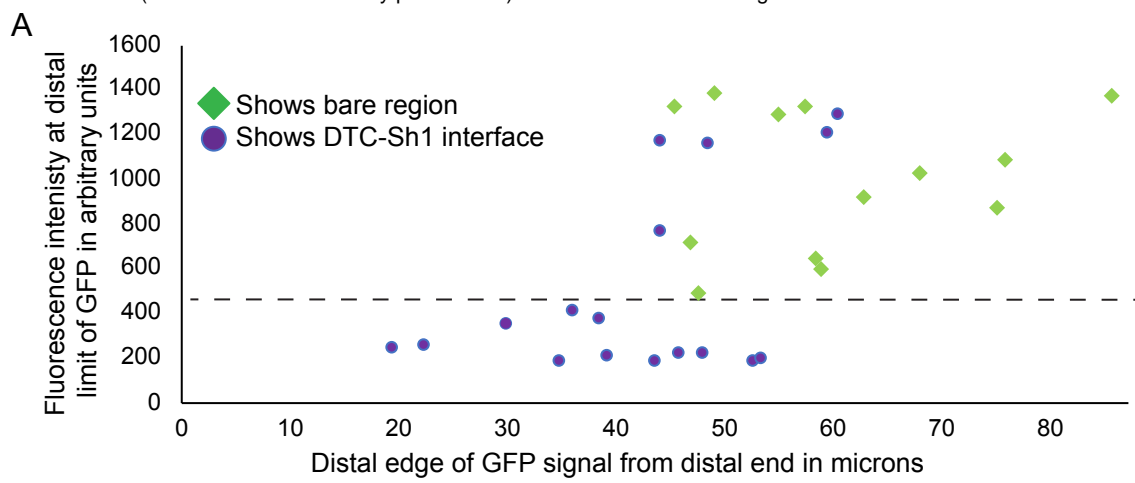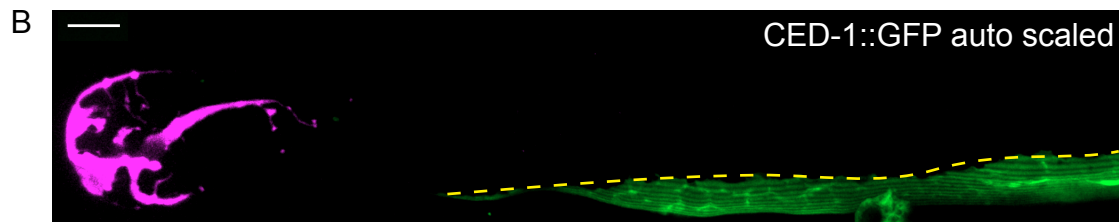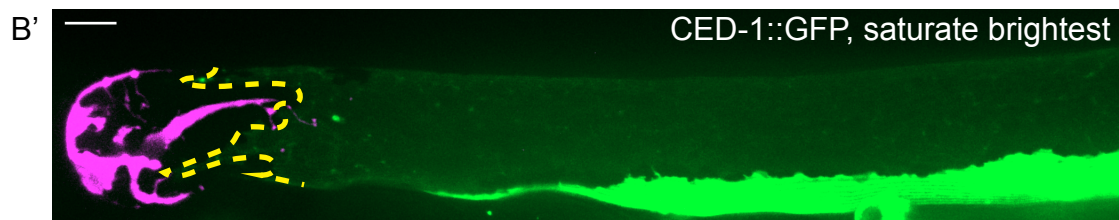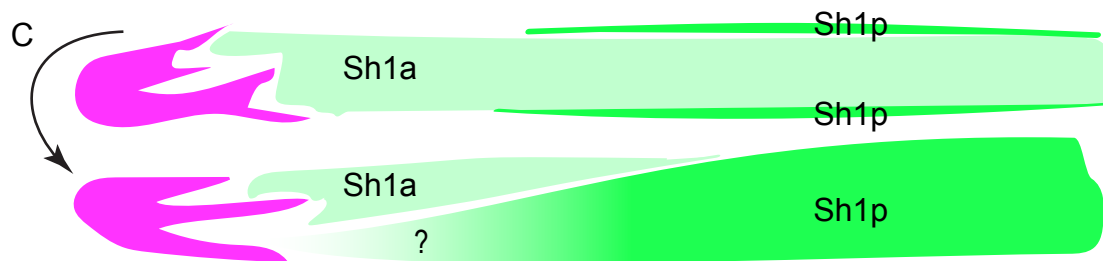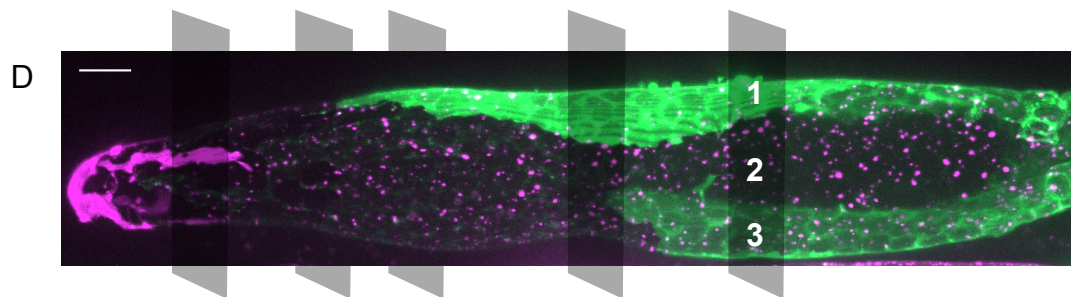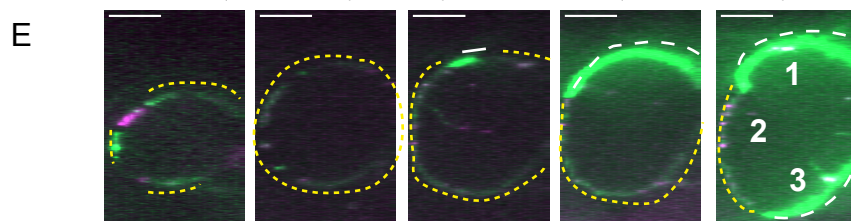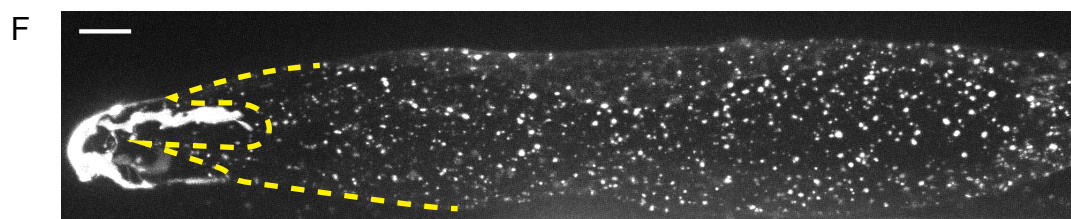



576 **Figure 3. *lim-7p::ced-1::GFP* has variable expression intensity that conceals distal position of**  
577 **Sh1.** (A) Plot of distal position vs. fluorescence intensity in arbitrary units of CED-1::GFP at the distal  
578 limit of its domain in *lim-7p::ced-1::GFP* DG5020 animals. Dashed black line: all of the lowly-  
579 expressing gonads (under ~400 A.U., or <30% maximum brightness of brightest sample) have a  
580 DTC-Sh1 interface detected. (B) DG5020 sample in which disparate expression levels in the two Sh1  
581 cells of a single gonad arm obscure detection of the DTC-Sh1 interface. The GFP channel is scaled  
582 automatically in B; B' is scaled to saturate the brightest pixels and reveal the dim second Sh1 cell. (C)  
583 Schematic showing Sh1 pair configuration over distal germ line, with the distal extent of Sh1p  
584 uncertain in superficial projection. The two Sh1 cells of a pair descend from the anterior and posterior  
585 daughters of Z1 and Z4, so the two Sh1 cells are here labeled Sh1a and Sh1p (arbitrarily). Top,  
586 superficial view. Bottom, side view. (D) DG5131 Sample in which one Sh1 cell contacts the DTC  
587 around the circumference of the germ line and the other Sh1 cell lies at some distance from the distal  
588 end. Gray boxes and numbers mark planes and landmarks shown in (E). (E) Five cross sections  
589 through gonad in (E) made by projecting through two 1  $\mu$ m re-slices at the positions shown by gray  
590 boxes in (D). (F) Same worm as in (D,E); endogenously tagged *mKate::inx-8* more uniformly labels  
591 the Sh1 cells, obscuring their individual shapes. Same analysis for DG5020 shown in Figure 3  
592 Supplement 1. All scale bars 10  $\mu$ m.

Figure 4

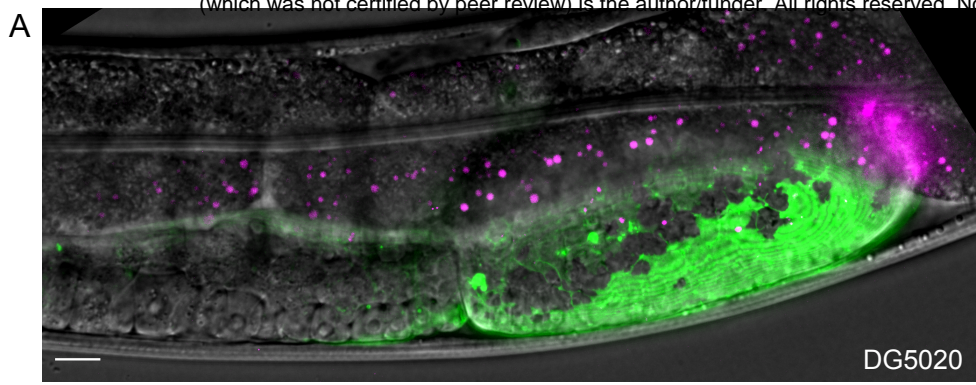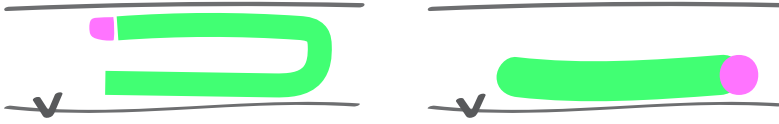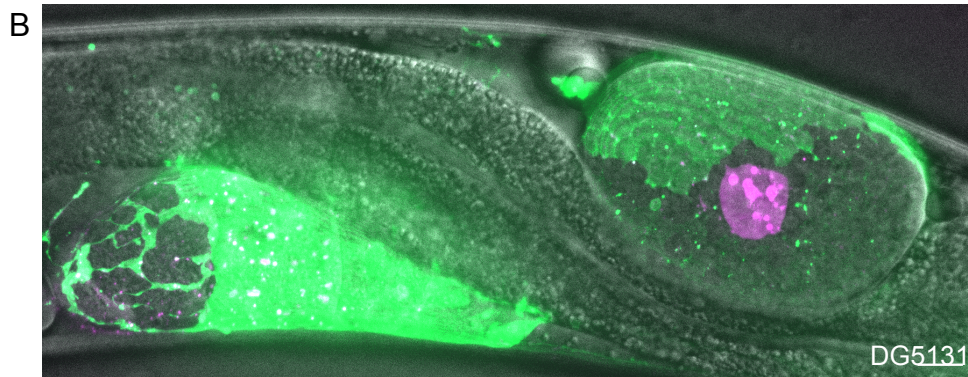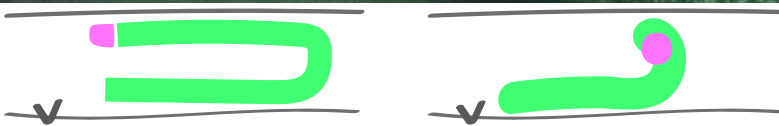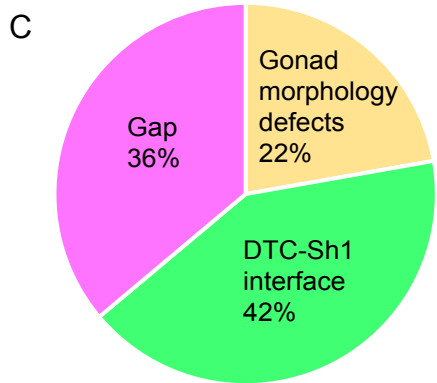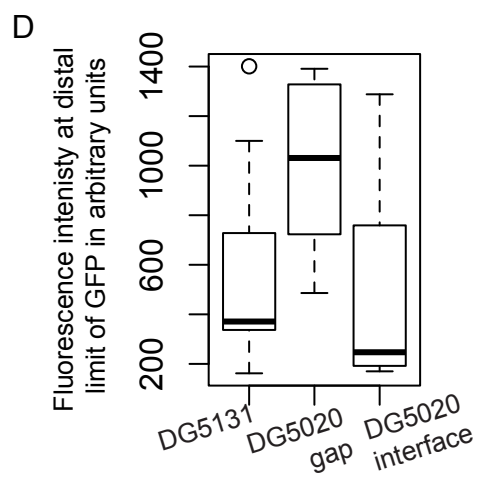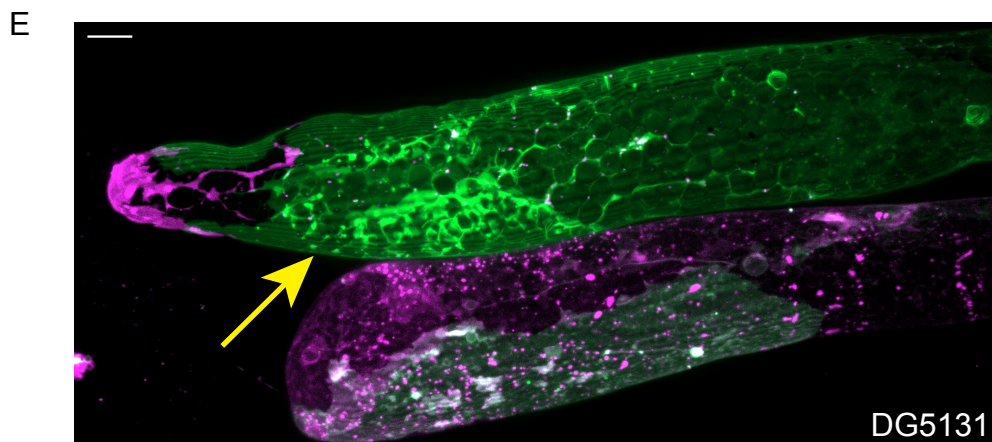

593 **Figure 4. *lim-7p::CED-1::GFP* is correlated with gonad defects.**  
594 (A) Example of gonad morphology defect in DG5020 strain, in which the gonad failed to turn. (B)  
595 Example of gonad morphology defect in DG5131 strain, in which gonad turned once and arrested  
596 without elongating along the dorsal body wall. Schematics in A and B show wild-type gonad  
597 morphology with two turns and a DTC that arrives at the dorsal midbody, left, beside schematics of  
598 defective gonad migration shown in micrographs. (C) Relative proportions of phenotypes observed in  
599 DG5020 animals (N=72). (C) Boxplot comparing fluorescence intensity for coexpressing strain  
600 DG5131 in addition to data shown in Figure 3 for DG5020. Fluorescence intensity of the *lim-7p::ced-*  
601 *1::GFP* transgene in this background is statistically indistinguishable from expression levels of this  
602 transgene in an otherwise wild type background in the subset of samples that display a DTC-Sh1  
603 interface, shown here segregated from samples from this strain that show a gap between the DTC  
604 and Sh1 cells. DG5131 N=17. DG5020 gap N=13. DG5020 interface N=17. A one-way ANOVA to  
605 determine the effect of category (genotype or presence of an interface) and fluorescence intensity  
606 was performed and was significant,  $F_{2,44}=7.70$ ,  $p=0.001$ ). Tukey's multiple comparison test finds that  
607 the mean fluorescence intensity of DG5020 gonads with a DTC-Sh1 interface differs from DG5020  
608 gonads with a gap between Sh1 and the distal end ( $p=0.002$ ) and does not differ from DG5131  
609 worms ( $p=0.908$ ). (G) Gonad from DG5131 strain with yellow arrow indicating aberrant engulfment of  
610 germ cells in the proliferative zone. All scale bars 10  $\mu\text{m}$ .

Figure 5

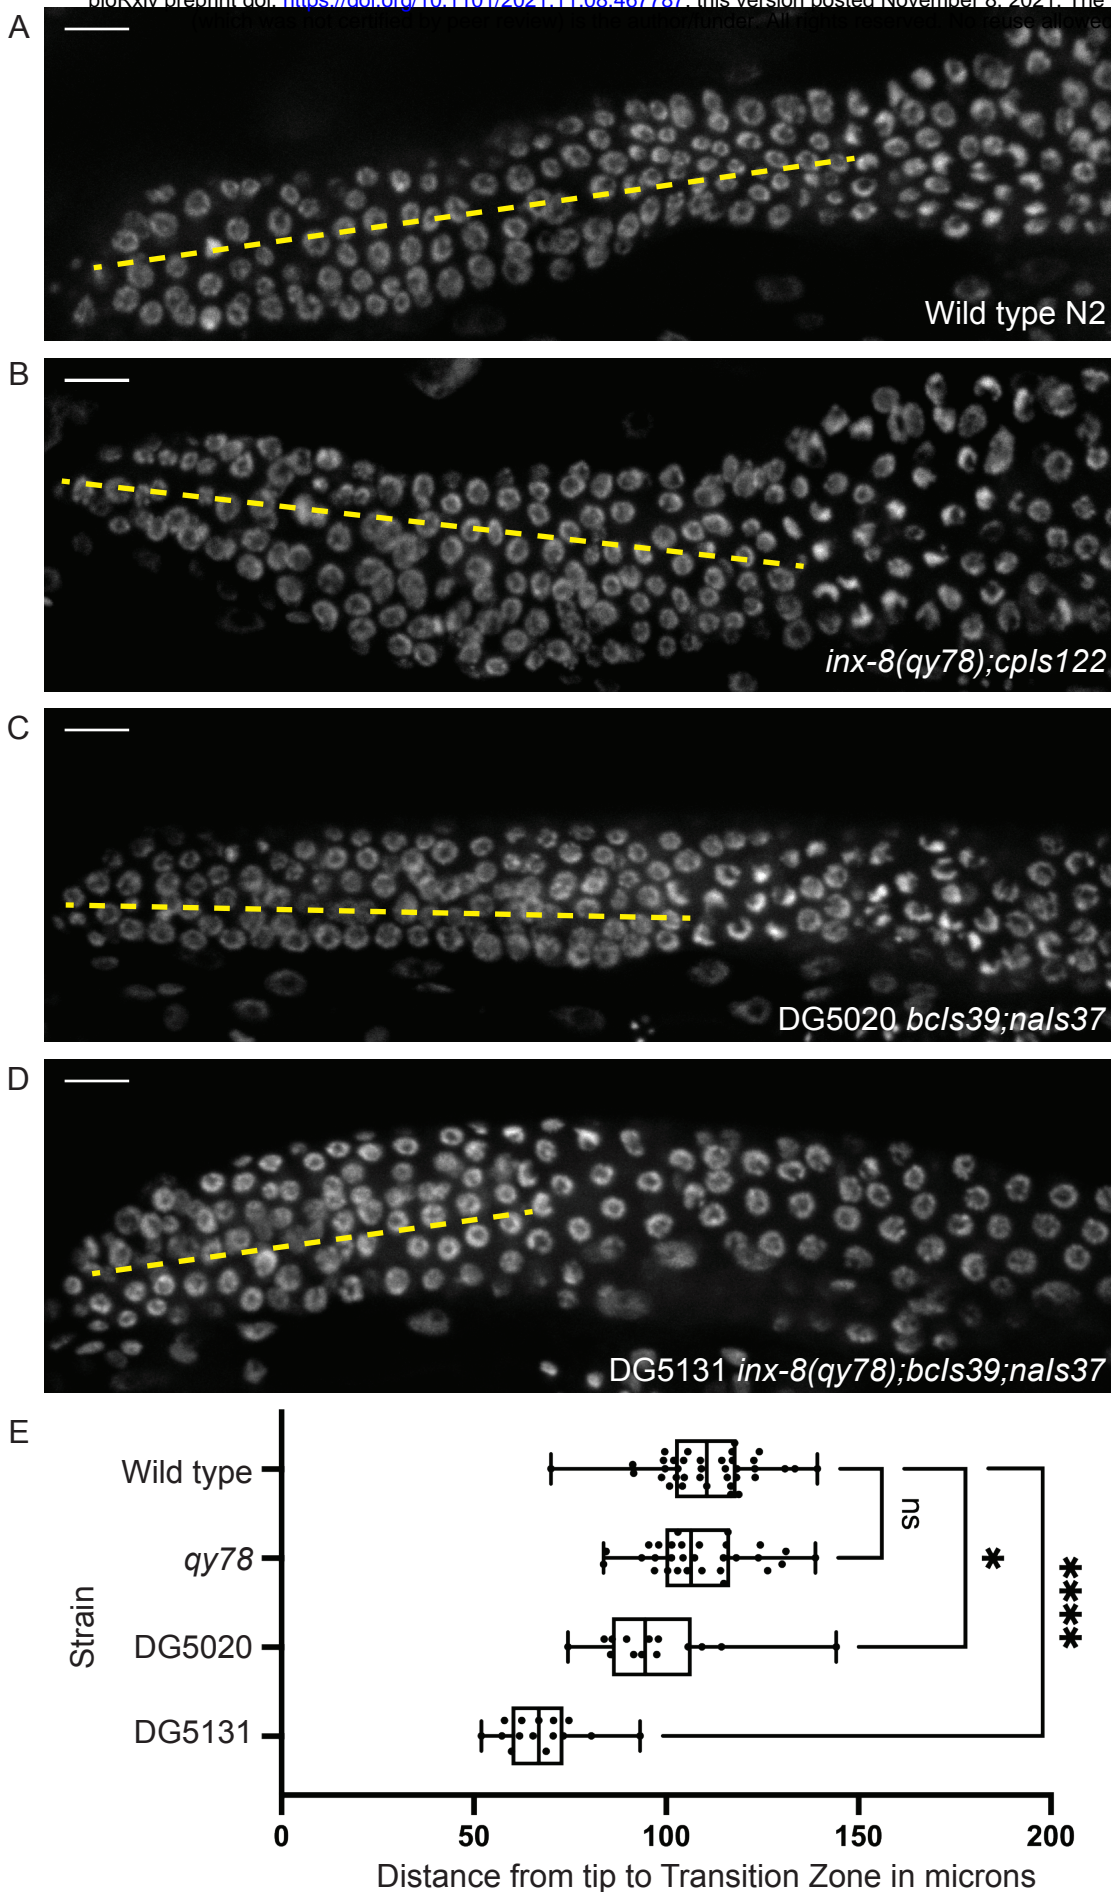

611 **Figure 5. A synthetic interaction between *lim-7p::ced-1::GFP* and the tagged innexin *qy78***  
612 **shortens the proliferative zone .** (A-D) DAPI staining of distal germ lines from wild type N2 (N=37),  
613 (B) the strain with the tagged innexin *qy78[mKate::inx-8]*, (N=30), (C) the DG5020 strain with *lim-*  
614 *7p::ced-1::gfp* (N=14), (D) and the DG5131 strain combining these sheath markers (N=15). Germ line  
615 proliferative zone length marked in each image with yellow dashed line. Representative images  
616 chosen had measurements within 10% of average measured for that strain. Boxplots showing length  
617 of proliferative zones for all strains. A one-way ANOVA to determine the effect of genotype on length  
618 of proliferative zone was significant  $F_{3,92}=40.59$ ,  $p<0.0001$ . Tukey's multiple comparison test revealed  
619 that *qy78* did not differ from wild type (mean difference 1.91  $\mu\text{m}$ , 95% CI -6.758  $\mu\text{m}$  to 10.58  $\mu\text{m}$ ,  
620  $p=.939$ ), DG5020 barely differed from wild type (mean difference of 12.97  $\mu\text{m}$ , 95% CI 1.1899  $\mu\text{m}$  to  
621 24.04  $\mu\text{m}$ ,  $p=0.015$ ), and DG5131 dramatically differed from wild type (mean difference of 43.08, 95%  
622 CI 32.28  $\mu\text{m}$  to 53.88  $\mu\text{m}$ ,  $p<0.0001$ ). DG5131 was also significantly different from both of its parent  
623 strains (DG5131 vs. *qy78* mean difference of 41.14  $\mu\text{m}$ , 95% CI 30.01  $\mu\text{m}$  to 52.33  $\mu\text{m}$ ,  $p<0.0001$ ;  
624 DG5131 vs. DG5020 mean difference of 30.11  $\mu\text{m}$ , 95% CI 17.00  $\mu\text{m}$  to 43.22  $\mu\text{m}$ ,  $p<0.0001$ ). All  
625 scale bars 10  $\mu\text{m}$ .

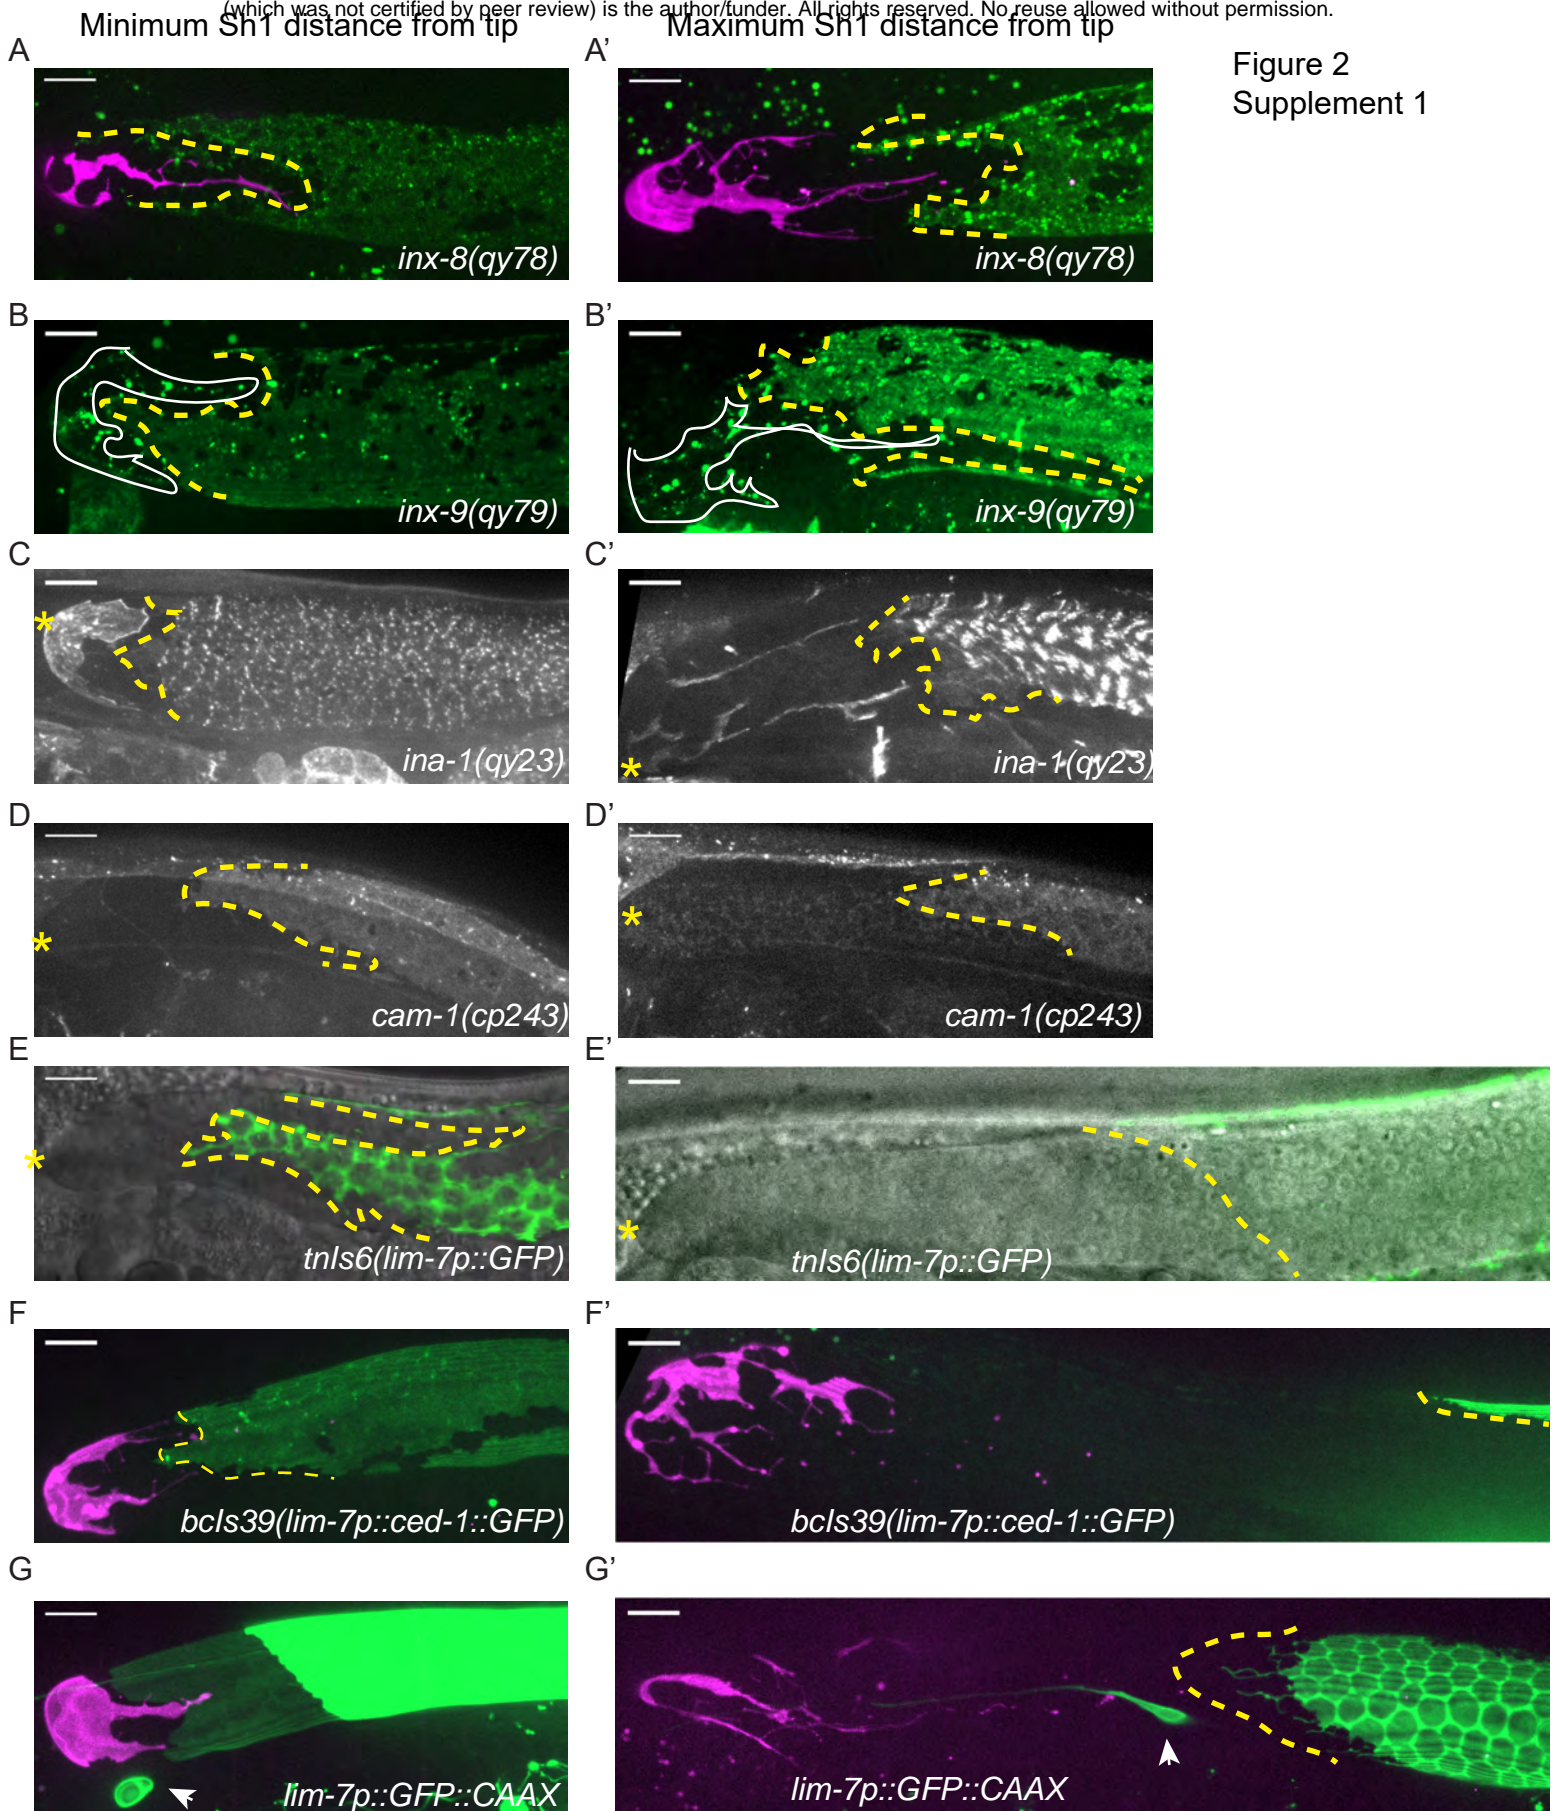

626 **Figure 2 Supplement 1. Endogenously tagged fluorescent proteins in the Sh1 membrane are**  
627 **less variable than overexpressed integrated transgenes.** Minimum (left column) and maximum  
628 (right column) measurements of the distance between distal Sh1 and the distal end of the gonad for  
629 (A, A') *qy78[mKate::inx-8]*, (B, B') *qy79[GFP::inx9]*, (C, C') *qy23[ina-1::mNG]*, (D, D') *cp243[cam-*  
630 *1::mNG]* (E, E') *tnls6[lim-7::GFP]*, (F, F') *bcls39[lim-7p::ced-1::GFP]*, (G, G') *rlmls5[lim-*  
631 *7p::GFP::CAAX]*. Arrowheads in G and G' mark non-sheath cells positive for *lim-7p::GFP::CAAX*  
632 expression that in plane with the gonad and are unavoidably included in Z-projections that capture the  
633 gonadal cell surface. Note especially in G how dim the Sh1 expression is at the distal extent,  
634 resembling what is sometimes seen for CED-1::GFP expression as reported by Figure 2 Figure  
635 Supplement 2B of (Tolkin et al., 2021). In some cases, the selected images are near-minimum or  
636 near-maximum due to imaging artifacts like low illumination or sample movement in the true minimum  
637 or maximum images. All scale bars 10  $\mu$ m.

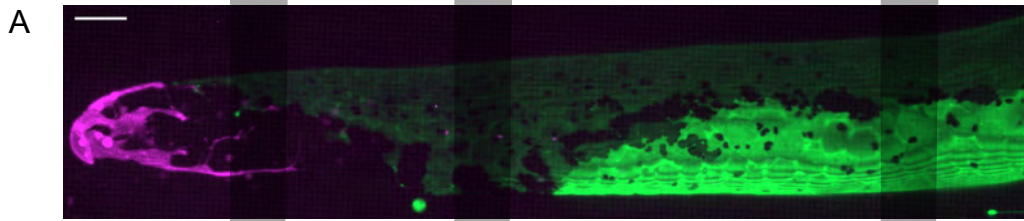

Figure 3  
Supplement 1

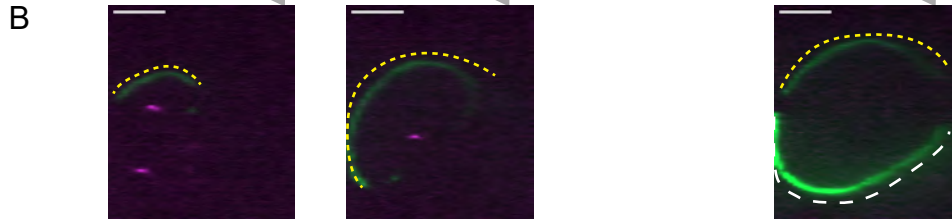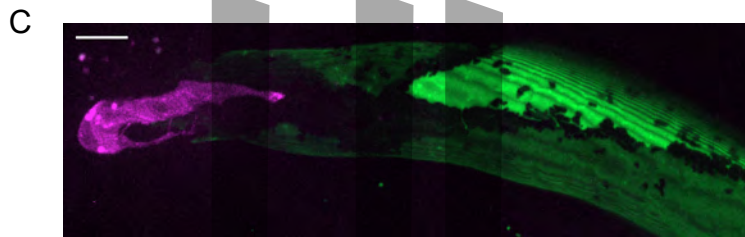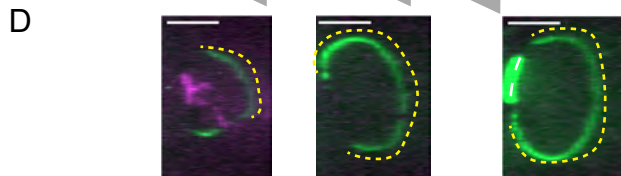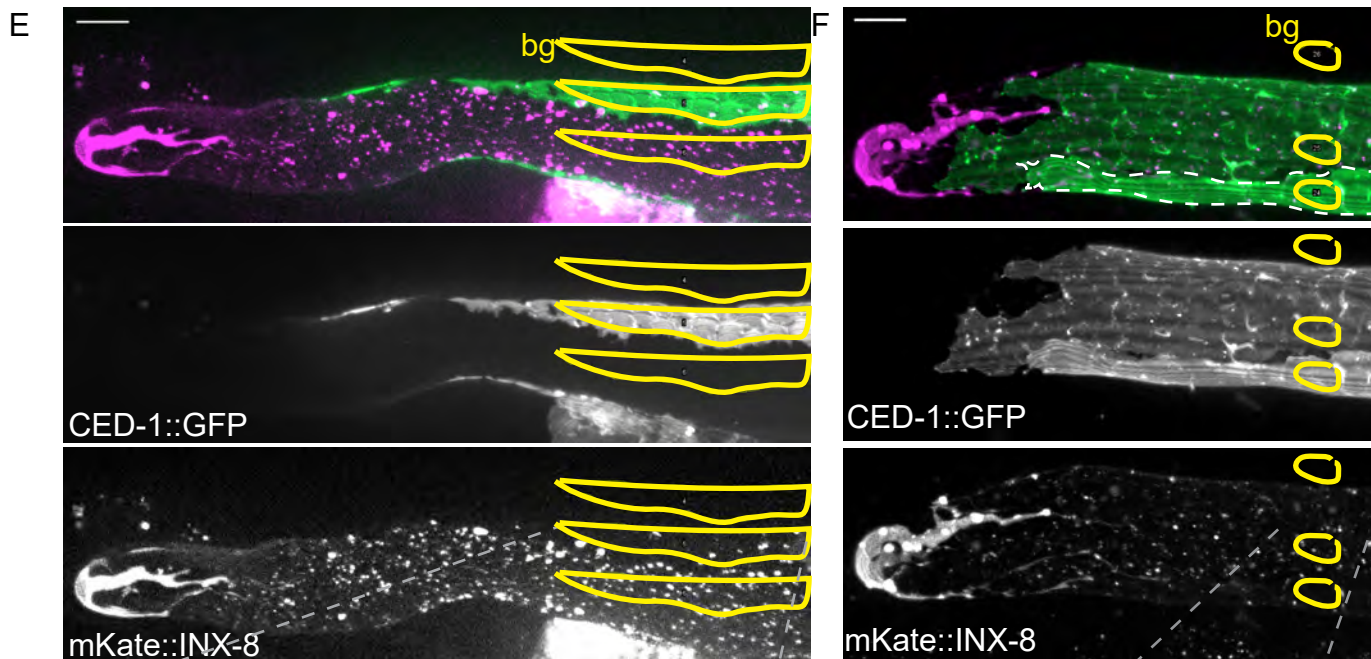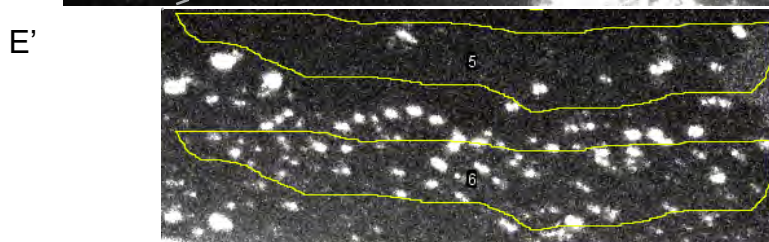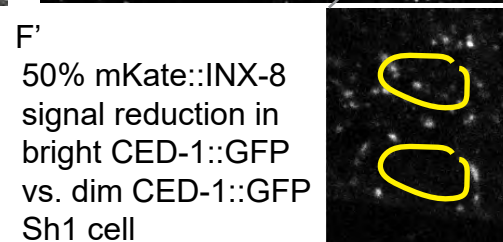



638 **Figure 3 Supplement 1. The Sh1 cells of a pair can take two distinct configurations over the**  
639 **distal germ line.** (A) Example of a gonad from DG5020 *lim-7p::ced-1::GFP* animal with dramatically  
640 different CED-1::GFP signals revealing the shapes of the two Sh1 cells of the pair. Gray boxes show  
641 planes depicted in (B). (B) Three cross sections through gonad in (A) made by maximum projection  
642 through two 1  $\mu\text{m}$  re-slices (FIJI) at the positions shown by gray boxes in (A). Dashed yellow and  
643 white lines mark the two Sh1 cells. Depending on the proximodistal position of the gonad, one or the  
644 other Sh1 cell may surround more of the germ line. (C) Example of another gonad from DG5020. (D)  
645 Three cross sections through gonad in (C) made by projecting through two 1  $\mu\text{m}$  re-slices at the  
646 positions shown by gray boxes in (C). (E,F) Gonads from strain DG5131 with merged images on top,  
647 CED-1::GFP channel in the middle, and mKate::INX-8 and distal tip marker channel on the bottom.  
648 Yellow outlines show regions of interest in which fluorescence intensity was measured. bg =  
649 background, subtracted from fluorescence intensity measured in each of the two Sh1 cells, which  
650 express CED-1::GFP at disparate levels. (E' and F') Insets from E and F. In both cases, mKate::INX-  
651 signal is half as strong in the Sh1 cells with more CED-1::GFP. Note also in E and F that mKate::INX-  
652 8 and bright CED-1::GFP mark a different distal extent of Sh1. All scale bars 10  $\mu\text{m}$ .
